1 **Genetic evidence of a functional linkage between the RNA-dependent RNA polymerase**  
2 **and the highly structured S fragment located at the 5' end of the genome of foot-and-**  
3 **mouth disease virus.**

4  
5 **Joseph C. Ward<sup>a</sup>, Lidia Lasecka-Dykes<sup>b</sup>, Samuel J. Dobson<sup>a</sup>, Sarah Gold<sup>b</sup>, Natalie J.**  
6 **Kingston<sup>a</sup>, Morgan R. Herod<sup>a</sup>, Donald P. King<sup>b</sup>, Tobias Tuthill<sup>b</sup>, David J. Rowlands<sup>a#</sup>**  
7 **and Nicola J. Stonehouse<sup>a#</sup>**

8  
9 a School of Molecular and Cellular Biology, Faculty of Biological Sciences and Astbury  
10 Centre for Structural Molecular Biology, University of Leeds, Leeds, United Kingdom.

11 b The Pirbright Institute, Ash Road, Pirbright, Surrey, GU24 0NF, United Kingdom.

12  
13  
14 **Running Head:** The S fragment in FMDV replication

15  
16 #Address correspondence to Nicola J. Stonehouse, [N.J.Stonehouse@leeds.ac.uk](mailto:N.J.Stonehouse@leeds.ac.uk)

17 David J. Rowlands, [d.j.rowlands@leeds.ac.uk](mailto:d.j.rowlands@leeds.ac.uk)

18  
19  
20 **Key Words:** picornavirus, S fragment, SHAPE, replication, 5' UTR, 3D<sup>pol</sup>

21  
22 **Abstract word count: 223**

23 **Text word count: 5731**

24

25

## 26 **Abstract**

27 Secondary and tertiary RNA structures play key roles in genome replication of picornaviruses.  
28 Complex, functional structures are particularly abundant in the untranslated regions, where  
29 they are involved in initiation of translation, priming of new strand synthesis and genome  
30 circularisation. The 5' UTR of foot-and-mouth disease virus (FMDV) is predicted to end in a  
31 *c.* 360 nucleotide-long stem-loop, termed the short (S) fragment. This structure is highly  
32 conserved and essential for viral replication, but the precise function(s) is unclear. Here, the  
33 validity of earlier structural predictions was strengthened by comparative genomic analyses  
34 that confirmed structure conservation of S fragments from a wide range of field isolates. In  
35 addition, we used selective 2' hydroxyl acetylation analysed by primer extension (SHAPE) to  
36 experimentally-determine the organisation of the structure of the genome. To examine the role  
37 of S fragment stem-loop structure in virus replication, we introduced a series of deletions to  
38 the distal and proximal regions. These truncations affected genome replication in a size-  
39 dependent and, in some cases, host cell-dependent manner. Furthermore, during passage of  
40 viruses incorporating the largest tolerated deletion from the proximal region of the S fragment  
41 stem-loop, an additional mutation was selected in the viral RNA-dependent RNA polymerase,  
42 3D<sup>pol</sup>, which influenced the function of the enzyme. These data suggest that the S fragment and  
43 3D<sup>pol</sup> interact in the formation of the FMDV replication complex.

44

## 45 **Author summary**

46

47 Foot-and-mouth disease (FMD) is a highly contagious viral disease. It is a constant threat to  
48 the global livestock industry, as it remains endemic in many parts of the world. A deeper  
49 understanding of the molecular mechanisms of FMDV replication could help facilitate the  
50 development of future novel control measures for FMD. However, a number of features of the  
51 viral RNA genome remain poorly understood, including the role of a highly structured region,

52 termed the S fragment. In this study, we examined the structure of the S fragment and  
53 introduced a series of deletions. These affected the ability to replicate. Furthermore, mutations  
54 which arose when one of the deletions was incorporated into virus indicates that the S fragment  
55 RNA and the RNA-dependent RNA polymerase enzyme interact during viral replication.

56

57

58

## 59 Introduction

60 The *Picornaviridae* is a family of single-stranded positive sense RNA viruses with small  
61 genomes approximately 7.5 - 8 kb in length. Typically the genome comprises a major single  
62 open reading frame flanked by 5' and 3' untranslated regions (UTRs), however, additional small  
63 open reading frames have been identified in some cardioviruses and enteroviruses (1, 2). The  
64 large 5' UTRs present in most picornaviruses range from ~800 to ~1300 nucleotides (nts) and  
65 have been predicted *in silico* by energy minimisation algorithms to comprise several distinct  
66 highly structured domains. Some of these RNA structures are common for all picornaviruses  
67 and have been well characterised, for instance an internal ribosome entry site (IRES)  
68 responsible for the initiation of translation, which comprises ~450 nts for most picornaviruses,  
69 although smaller IRES elements resembling those found in some flaviviruses were also found  
70 (3–5). The number and organisation of these structural domains varies amongst picornaviruses.  
71 For example, a small stem-loop, the cis-active replicative element (*cre*), which is essential for  
72 replication, is found in the 5' UTR of *Aphthoviruses*, but within the coding region in  
73 *Enteroviruses* (6–8). All picornavirus genomes include a structured domain at the 5' end,  
74 although the size, conformation and sequence varies in viruses from different genera.  
75 Enterovirus 5' UTRs terminate in a ~80 nucleotide cloverleaf structure, while in *Aphthoviruses*  
76 and *Cardioviruses* the 5' end forms an extended stem-loop (9–11). The size of this stem-loop  
77 varies markedly; 40 nts in *Hepatoviruses* and ~80 nts in *Cardioviruses*, whereas the largest  
78 (~360 nts) is present in the *Aphthoviruses* (12). The functions of some of these RNA structures  
79 remain unknown.

80

81 Here, we focus on the long 5' terminal stem-loop (termed S fragment) of foot-and-mouth  
82 disease virus (FMDV), a pathogen of cloven-hoofed animals, which belongs to the genus  
83 *Aphthovirus*. FMDV is the causative agent of foot-and-mouth disease, a highly contagious and

84 economically important infection posing a constant thread to the global livestock industry. In  
85 endemic countries FMD is controlled by vaccination and by movement restrictions, while  
86 movement restrictions and slaughter were used when outbreaks occurred in non-endemic  
87 countries (13). Control by vaccination is complicated by high antigenic variability and the  
88 occurrence of asymptomatic carrier animals (14–16). FMDV has an 8.5 kb RNA genome  
89 organised into L, P1-2A, P2 and P3 coding regions, flanked by the 5' UTR described above  
90 and a short 3' UTR. L is a protease responsible for separating itself from the polyprotein and  
91 cleaving key cellular proteins, P1 encodes the structural (capsid) proteins, while P2 and P3  
92 encode non-structural proteins involved in genome replication. The latter include the RNA-  
93 dependent RNA polymerase (RdRp, also termed 3D<sup>pol</sup>) and the protease 3C<sup>pro</sup>, as well as less  
94 well-characterised proteins including 2C, a potential helicase (17–19). At approximately 1.3  
95 kb, the 5' UTR of FMDV is ~1/7<sup>th</sup> of the entire genome and is the longest 5' UTR within the  
96 family *Picornaviridae* (10). Its sequence comprises at least five structurally and functionally  
97 distinct domains. The S fragment stem-loop is located at the 5' terminus and is followed by a  
98 long poly-C-tract of variable length (about 70 to 250 nts), 2-4 tandem repeated sequences  
99 predicted to form pseudoknots, the small stem-loop *cre* involved in uridylation of the  
100 replication primer peptide VPg and finally the IRES element responsible for protein translation  
101 initiation (20). The functions of several of these domains are poorly understood (21, 22),  
102 although we have recently described the importance of a sequence in the pseudoknot region for  
103 virus assembly (23).

104

105 Whilst the S fragment is known to be essential for replication, its precise function remains  
106 unclear. The secondary structure of the S fragment appears to be conserved, although its  
107 sequence and length varies between different clades of FMDV (10, 24). Truncated S fragments  
108 have been observed for some field isolates, each time retaining its long stem-loop structure

109 (10). It has been reported that while distal portions of this stem-loop structure are not essential  
110 for genome replication, they play a role in the modulation of host-cell innate immune responses  
111 (25, 26). A corresponding structure present at the 5' end of poliovirus (PV) RNA, a highly  
112 structured region called cloverleaf, is involved in the switch from protein translation to RNA  
113 replication, in addition to recruiting host and viral proteins which contribute to RNA  
114 circularisation during genome replication (9, 27). It is possible that the S fragment in FMDV  
115 has similar roles and it is known to interact with the 3' UTR, suggesting a role in genome  
116 circularisation (28).

117 We used selective-2' hydroxyl acylation analysed by primer extension (SHAPE) to provide  
118 direct evidence to complement comparative bioinformatic analyses and *in silico* predictions of  
119 the structure of the S fragment. We confirm that substantial deletions can be made to the distal  
120 region of the S fragment stem-loop without seriously compromising *in vitro* replication,  
121 although host cell differences were observed. We also show that proximal deletions are less  
122 well tolerated, which correlates with our observation that the proximal part of the S fragment  
123 shows higher conservation of nucleotide pairings. Furthermore, viruses reconstructed to  
124 include the maximal viable proximal deletion can, during sequential passages, select a  
125 compensatory mutation in the 3D<sup>pol</sup>. This mutation is located in a highly conserved position  
126 known to interact with template RNA, and granted faster replication of a mutant replicon  
127 carrying this proximal S fragment deletion.

128

## 129 **Material and Methods**

### 130 **Cells lines.**

131 Baby hamster kidney (BHK)-21 and Madin-Darby bovine kidney (MDBK) cells were obtained  
132 from the American Type Culture Collection (ATCC) (LGC Standard) and maintained in  
133 Dulbecco's modified Eagle's Medium with glutamine (Sigma-Aldrich) supplemented with  
134 10% foetal calf serum (FCS), 50 U/ml penicillin and 50 µg/ml streptomycin as previously  
135 described (29).

136

### 137 **Plasmid construction.**

138 The FMDV ptGFP replicon plasmids along with the equivalent 3D<sup>pol</sup> knock-out controls 3D<sup>pol</sup>  
139 -GNN have already been described (30, 31).

140

141 A variant of the ptGFP replicon was produced to allow for easy mutagenesis of the S-fragment.  
142 An *EagI* site was introduced at each end of the S-fragment by PCR mutagenesis, altering the  
143 wild-type sequence from AAAGGGGGCATTAA to AAACGGCCGATTAA at the 5' end and  
144 GCGCCCGCCTTT to GCGCGGCCGTTT at the 3' end. S-fragment sequences containing  
145 deletions were chemically synthesised (Thermofisher) and inserted into the replicon vector  
146 using complementary *EagI* sites.

147

148 Mutation of residue I189L of 3D<sup>pol</sup> in the ptGFP replicon was achieved by PCR mutagenesis  
149 resulting in A7023C substitution. All primer sequences are available on request.

150

### 151 **Protein purification.**

152 The I189L mutation was introduced into the His-tagged 3D<sup>pol</sup> expression clone pET28a-3D,  
153 and recombinant protein was expressed and purified as previously described (32, 33).

154

155 ***In vitro* transcription.**

156 *In vitro* transcription reactions were performed as described previously (34, 35). Briefly, 5 µg  
157 of replicon plasmid was linearised with *AscI* (NEB), purified by phenol-chloroform extraction,  
158 ethanol precipitated, redissolved in RNase-free water and used in a T7 *in vitro* transcription  
159 reaction. Reactions were incubated at 32°C for 4 hours, treated with 1.25 units of RQ1 DNase  
160 for 30 minutes at 37°C and RNA recovered using an RNA Clean & Concentrator-25 spin  
161 column kit (Zymo Research), following manufacturer's instructions. All transcripts were  
162 quantified by NanoDrop 1000 (Thermo Scientific) and RNA integrity assessed by MOPS-  
163 formaldehyde gel electrophoresis.

164

165 **Replication assays.**

166 BHK-21 and MDBK cell based replicon replication assays were performed in 24-well plates  
167 with 0.5 µg/cm<sup>2</sup> of RNA using Lipofectin transfection reagent (Life Technologies) as  
168 previously described (35). For every experiment, transfection was performed in duplicate and  
169 experiments biologically repeated as indicated. Replicon replication was assessed by live cell  
170 imaging using an IncuCyte Zoom Dual colour FLR, an automated phase-contrast and  
171 fluorescent microscope within a humidifying incubator. At hourly intervals up to a defined end  
172 point, images of each well were taken and used to enumerate the ptGFP positive cell count per  
173 well, using our established protocols (34, 35). Data are shown at 8 hours post transfection  
174 (when maximum replication was observed) on a linear scale.

175

176 For ribavirin sensitivity assays, BHK-21 cells were pre-treated with ribavirin (Sigma) for 7  
177 hours prior to transfection.

178



179 **SHAPE analysis.**

180 RNA transcripts representing the entire 5' UTR of FMDV (nucleotides 1 – 1581) were  
181 prepared as above. A sample containing 12 pmol of transcribed RNA was heated to 95°C for  
182 2 minutes before cooling on ice. RNA folding buffer (100 mM HEPES, 66 mM MgCl<sub>2</sub> and  
183 100 mM NaCl) was added to the RNA and incubated at 37°C for 30 minutes. The folded  
184 RNA was treated with 5 mM *N*-methyl isatoic anhydride (NMIA) or DMSO for 50 minutes at  
185 37°C. The chemically modified RNA was ethanol precipitated and resuspended in 0.5x Tris-  
186 EDTA (TE) buffer.

187

188 Hex or FAM fluorescent primers were bound to modified RNA by heating the reaction to 85°C  
189 for 1 minute, 60°C for 10 minutes and 35°C for 10 minutes in a thermocycler. Reverse  
190 transcription was continued using Superscript III (Invitrogen) following manufacturers  
191 protocol with incubation at 52°C for 30 minutes.

192

193 Post-extension, cDNA:RNA hybrids were disassociated by incubation with 4M NaOH at 95°C  
194 for 3 minutes before neutralisation with 2M HCl. Extended cDNA was ethanol precipitated  
195 and resuspended in deionized formamide (Thermo Fisher). Sequencing ladders were similarly  
196 produced using 6 pmol of RNA with the inclusion of 10 mM ddCTP in the reverse transcription  
197 mix and using a differentially labelled fluorescent primer (either Hex or FAM). A sequencing  
198 ladder was combined with NMIA or DMSO samples and dispatched on dry ice for capillary  
199 electrophoresis (Dundee DNA seq) (23).

200

201 NMIA reactivity was used as constraints for RNA secondary structure prediction of the S  
202 fragment using the Vienna RNA probing package and based on sequence of the replicon used  
203 in this study (36).

204

205 **Construction of recombinant viruses.**

206 Replicons used here are based on plasmid pT7S3 which encodes a full-length infectious copy  
207 of FMDV O1 Kaufbeuren (O1K) (37). To generate infectious viral genomes the reporter  
208 sequence was removed from replicons by digestion with flanking *PsiI* and *XmaI* restriction  
209 enzymes and replaced with the corresponding fragment from pT7S3 encoding the capsid  
210 proteins. Full length viral RNA was transcribed using a T7 MEGAscript kit (Thermo Fisher  
211 Scientific), DNase treated using TurboDNase (Thermo Fisher Scientific) and purified using a  
212 MEGAclear Transcription Clean-Up kit (Thermo Fisher Scientific). RNA quality and  
213 concentration were determined by denaturing agarose gel electrophoresis and Qubit RNA BR  
214 Assay Kit (Thermo Fisher Scientific).

215

216 **Virus recovery.**

217 BHK-21 cells were transfected in 25 cm<sup>2</sup> flasks with 8 µg per flask of infectious clone-derived  
218 RNA using TransIT transfection reagent (Mirus) as described previously (35). At full  
219 cytopathic effect (CPE) or 24 hours post-transfection (whichever was earlier) cell lysates were  
220 freeze-thawed and clarified by centrifugation. The clarified lysate (1 ml) was blind passaged  
221 onto naïve BHK-21 cells and this was repeated for five rounds of passaging.

222

223 **Sequencing of recovered virus.**

224 Recovered viruses at passage 3, 4 and 5, were sequenced with an Illumina Miseq (Illumina)  
225 using a modified version of a previously described PCR-free protocol (38). Total RNA was  
226 extracted from clarified lysates using TRizol reagent (Thermo Fisher Scientific) and residual

227 genomic DNA was removed using DNA-free DNA removal Kit (Thermo Fisher Scientific)  
228 prior to ethanol precipitation. Purified RNA was used in a reverse transcription reaction as  
229 previously described (38, 39). Following reverse transcription, cDNA was purified and  
230 quantified using a Qubit ds DNA HS Assay kit (Thermo Fisher Scientific) and a cDNA library  
231 prepared using Nextera XT DNA Sample Preparation Kit (Illumina). Sequencing was carried  
232 out on the MiSeq platform using MiSeq Reagent Kit v2 (300 cycles) chemistry (Illumina) and  
233 paired-end sequencing.

234

235 FastQ files were quality checked using FastQC with poor quality reads filtered using the Sickle  
236 algorithm (40). Host cell reads were removed using FastQ Screen algorithm and FMDV reads  
237 assembled *de novo* into contigs using IDBA-UD (41). Contigs that matched the FMDV library  
238 (identified using Basic Local Alignment Search Tool (BLAST)) were assembled into  
239 consensus sequences using SeqMan Pro software in the DNA STAR Lasergene 13 package  
240 (DNA STAR) (42). Finally, the filtered fastQ reads were aligned to the *de novo* constructed  
241 consensus sequences using BWA-MEM algorithm incorporated into Burrows-Wheeler Aligner  
242 (BWA), and mutations were visualised using the Integrative Genomics Viewer (IGV) (43–46).

243

#### 244 **Cell killing assays.**

245 Virus titre was determined by plaque assay on BHK-21 cells as described before (47). BHK-  
246 21 cells were seeded with  $3 \times 10^4$  cells/well in 96 well plates and allowed to settle overnight.  
247 Cell monolayers were inoculated with each rescued virus at MOI of 0.01 PFU for 1 hour,  
248 inoculum was removed and 150  $\mu$ l of fresh GMEM (supplemented with 1% FCS) was added  
249 to each well. Appearance of CPE was monitored every hour by live cell microscopy (contrast  
250 phase) using the IncuCyte S3. CPE was observed as rounding of the cells and progress of

251 infection was monitored as a drop in confluency compared to the mock treated cells (i.e.,  
252 treatment with uninfected cell lysate). Serial images of cells were analysed using InCuCyte S3  
253 2018B software.

254

### 255 **Sym/Sub polymerase activity assays**

256 Sym/Sub RNA with sequence GCAUGGGCCC was synthesised (Sigma Aldrich) and 5' end  
257 labelled using  $\gamma^{32}\text{P}$  UTP (Perking Elmer) and T4 polynucleotide kinase (NEB) following  
258 manufacturer's protocol. Labelled RNA was purified by ethanol precipitation and resuspended  
259 in nuclease free water.

260

261 0.5  $\mu\text{M}$  of end labelled RNA was incubated in polymerisation buffer (30 mM MOPS pH 7.0,  
262 33 mM NaCl, 5 mM MgAc) and heated to 95°C for 2 minutes before chilling on ice. 2  $\mu\text{M}$  of  
263 recombinant 3D<sup>pol</sup> was added to the RNA and incubated at 37°C for 10 minutes to promote  
264 annealing. After annealing, 50  $\mu\text{M}$  of rNTP was added to the reaction, addition of nucleotide  
265 varied depending on experiment. Aliquots were taken periodically, and reactions stopped by  
266 addition of 2x TBE-urea RNA loading dye (Thermo Fisher).

267

268 Extension products in loading dye were heated to 70°C for 5 minutes before loading on a 23%  
269 denaturing polyacrylamide gel containing 7 M urea. Samples were electrophoresed until  
270 sufficiently separated. After electrophoresis gels were fixed for 30 minutes in fixative solution  
271 and exposed onto a phosphoscreen (48, 49).

272

### 273 **Bioinformatic analysis**

274 Full genome sequences of 118 FMDV isolates, representing all seven serotypes  
275 (Supplementary Table S1), were downloaded from GenBank. The sequences were chosen

276 (based on the region encoding the VP1 protein) to represent the known genomic diversity of  
277 FMDV across all seven serotypes. VP1 is the most variable part of the FMDV genome and  
278 frequently used to calculate phylogenetic relationship of FMDV isolates.

279 The RNA structure of the S fragment was predicted as described before using the RNAalifold  
280 program implemented in the ViennaRNA package (36, 50). For the covariance analysis, also  
281 calculated using RNAalifold program, only those isolates were included which contained  
282 complete sequence at the 5' end of the genome. Data representing covariance were  
283 superimposed onto the schematics of the S fragment RNA structure and visualised using Forna  
284 tool implemented in the ViennaRNA Web Services (51). The sequence logo representing  
285 amino acid conservation within positions 185 – 194 of the 3D<sup>pol</sup> was prepared using a WebLogo  
286 3.7.4 server and using 1123 FMDV 3D<sup>pol</sup> sequences obtained from fmdbase.org (an FMDV  
287 sequence database generated by the FAO World Reference Laboratory for FMD at The  
288 Pirbright Institute) (52, 53).

289

290 **Results**

291 **SHAPE analysis of the S fragment.**

292 Based on computational folding, such as mFOLD algorithms, the S fragment is predicted to  
293 form a single large hairpin stem-loop comprising approximately 360 nucleotides. Here, we use  
294 selective 2' hydroxyl acylation analysed by primer extension (SHAPE) to further investigate  
295 the structure of this part of the FMDV genome. This approach relies on the formation of 2'-O-  
296 adducts in single stranded and accessible regions of the RNA, which can then be detected by  
297 reverse transcription.

298

299 RNA transcripts representing the full FMDV 5' UTR were folded before incubation with 5 mM  
300 NMIA. The modified RNAs were then used in reverse-transcription reactions containing  
301 fluorescently end-labelled primers. Reverse transcription is terminated when the enzyme  
302 reaches a nucleotide with a NMIA adduct, thus creating a series of cDNA fragments of different  
303 lengths. These cDNA fragments were analysed by capillary gel electrophoresis alongside a  
304 sequencing ladder to identify the sites of termination, indicating the locations of unpaired and  
305 accessible nucleotides. The proximity of the poly-C-tract to the 3' end of the S fragment limited  
306 potential primer binding sites, resulting in unreliable data for the last 60 nucleotides of the S  
307 fragment and such was excluded from the analysis (shown in grey in Figure 1A). The rest of  
308 the S fragment was well covered and the SHAPE reactivities from 6 independent experiments  
309 were used to complement the mFOLD algorithm analyses to generate a structural prediction of  
310 this region (Figure 1).

311

312 In general, the SHAPE mapping data fitted well with the *in silico* predictions with the most  
313 reactive residues coinciding with bulges within the predominately double stranded stem-loop  
314 structure (Figure 1A). The locations of reactive residues can be seen in the NMIA reactivity  
315 graph, where groups of nucleotides within bulges showed high reactivity (Figure 1B). However,  
316 some predicted bulges showed little NMIA reactivity, suggesting steric hindrance possibly due  
317 to higher order tertiary structure. Similarly, some predicted base-paired nucleotides were  
318 NMIA reactive. These mostly occurred at the tops and bottom of bulges and may result from  
319 nucleotides becoming transiently available for modification during ‘breathing’ (54). The 5’  
320 terminal two nucleotides (uridines at position 1 and 2) were highly reactive and therefore likely  
321 to be non-base paired.

322

### 323 **The effects of deletions to the distal or proximal regions of the S fragment stem-loop on** 324 **replicon replication.**

325 The SHAPE data and the structural prediction described in Figure 1 were used to design a  
326 series of truncations to the S fragment, and the modified sequences were introduced into a  
327 replicon. The replicon was based on an infectious clone of FMDV O1K in which the P1 region  
328 of the genome is replaced with a ptGFP reporter (55) (Figure 2A). Deletions were designed to  
329 end at either the top or bottom of bulges, helping ensure that the stem-loop hairpin structure  
330 was maintained. To facilitate replacement of the S fragment with modified sequences *EagI*  
331 restriction sites were introduced at each end of the S fragment sequence. These sites required  
332 minimal modification of the original sequence and showed no predicted change in RNA  
333 structure, and the modified genome sequence is hereafter referred to as WT. Addition of the  
334 *EagI* site at the 5’ end of the S fragment resulted in a large drop in replication, however when  
335 paired with the 3’ *EagI* site, restoring base pairing, replicative potential was drastically

336 improved, although still below that of the original O1K WT sequence (Figure S1). Deletions  
337 of 70, 148, 246 and 295 nucleotides were introduced at the distal end (top) of the S fragment  
338 stem-loop (constructs named D-70, D-148, D-246 and D-295, respectively) and deletions of  
339 48, 97, 195 and 271 nucleotides were made to the proximal end (bottom) of the S fragment  
340 (constructs referred to as P-48, P-97, P-195 and P-271, respectively) (Figure 2B). The truncated  
341 sequences were chemically synthesised and introduced into the WT replicon via the *EagI* sites,  
342 meaning that the highly conserved 5' and 3' regions and essential UU nucleotides at positions  
343 1 and 2 were maintained in all truncation mutants. The eight new replicon clones were  
344 transcribed into RNAs and transfected into BHK-21 or MDBK cells, alongside WT and a 3D<sup>pol</sup>-  
345 GNN negative control. The 3D<sup>pol</sup>-GNN replicon cannot replicate and so the ptGFP signal  
346 produced represents translation of the input RNA. BHK-21 and MDBK cells are continuous  
347 cell lines known to support replication of FMDV: BHK-21 cells are used for FMDV vaccine  
348 production, whereas MDBK cells originate from a natural host of FMDV. Replication was  
349 monitored by measuring reporter expression using an IncuCyte ZOOM live cell imaging  
350 system, with analysis by our established protocols (performed 8 hours post transfection, when  
351 replication has reached its peak (Figure S2)) (Figure 2).

352

353 As described previously and consistent with sequence information from natural virus isolates  
354 (10, 26), the D-70 mutation caused no significant drop in replication in either cell line. However,  
355 the replicon bearing the D-148 deletion, which removes the distal half of the S fragment stem-  
356 loop, showed reduced replication in BHK-21 cells and none in MDBK cells (Figure 2C,D).  
357 Innate immunity is compromised in BHK-21 cells but intact in MDBK cells (56, 57),  
358 suggesting that the distal portion of the S fragment stem-loop plays a role in modulating a  
359 competent host immune response, in agreement with previously published data (25, 58).



360 Replicons with the largest distal deletions, D-246 and D-295, did not replicate in either cell  
361 line.

362

363 While the consequences of deleting sequences from the distal region of the S fragment stem-  
364 loop have been reported (25), the effects of proximal deletions have not been investigated. The  
365 two smallest proximal deletions (P-48 and P-97), showed modest but significant decreases in  
366 replication compared to WT (1.7 and 1.4-fold, respectively) (Figure 2E,F. However, the larger  
367 deletions, P-195 and P-271, completely ablated replication and reporter gene expression was  
368 reduced to a level comparable to the GNN control. Interestingly, there was no significant  
369 difference between the replication of the P-48 and P-97 deletions in either BHK-21 or MDBK  
370 cells (Figure 2). Overall, the proximal part of the S fragment stem-loop appears to be more  
371 sensitive to deletion in a cell type-independent manner, with truncations as small as 48  
372 nucleotides having a significant effect on replication.

373

374 Earlier studies indicated that the proximal part of the S fragment stem-loop is more conserved  
375 than the distal part (10). In recent years, advances in high throughput sequencing (HTS) have  
376 led to a great increase in the number of FMDV full genome sequences available on public  
377 domains, including sequences of viruses of SAT serotypes which were previously  
378 underrepresented. This increase in the range of sequences available prompted us to revisit the  
379 subject of the S fragment variability and we carried out a covariance analysis based on 118  
380 FMDV isolates representing all seven serotypes. Figure 3 shows that there is more base-pairing  
381 conservation in the proximal than in the distal parts of the S fragment stem-loop (Figure 3).  
382 The base-pairing conservation in the proximal part of the otherwise very variable S fragment  
383 stem-loop (low nucleotide identity of approximately 47%) suggests evolutionary pressure to

384 maintain the structure of this portion of the stem-loop and complements our observations from  
385 the replicon experiments (Figure 2) (10, 59).

386

387 **Viruses with proximal deletions of the S fragment replicate more slowly than WT and**  
388 **can select for a mutation in 3D<sup>pol</sup> during serial passage.**

389 We investigated the consequences of proximal deletions to the S fragment stem-loop further  
390 by introducing them into an FMDV O1K infectious clone. This enabled evaluation of  
391 replication in the context of the entire genome and investigation of the possible selection of  
392 compensatory or adaptive mutations during serial passage. Replicons bearing proximal  
393 deletions of the S fragment stem-loop were converted into infectious clones by replacing the  
394 ptGFP reporter sequence with the original O1K structural protein sequence. RNA transcripts  
395 of the truncated S fragment clones and WT were transfected into BHK-21 cells. Supernatants  
396 containing recovered virus were harvested and used to infect naïve BHK-21 cells for 5  
397 continuous passages. Recovery of infectious virus from each construct was assessed by the  
398 ability of 5<sup>th</sup> passage samples to induce CPE. As expected, CPE was induced and virus  
399 recovered from the WT construct. Infectious virus was also recovered from P-48 and P-97 but  
400 no virus was recovered from either P-195 or P-271 constructs.

401

402 The consequences of the P-48 and P-97 S fragment deletions for the dynamics of virus  
403 replication were investigated by assessing the time taken to induce CPE in BHK-21 cell  
404 monolayers after infection with the mutated viruses or WT at a low MOI of 0.01 PFU. The  
405 integrity of the cell monolayers was assessed at hourly intervals over 63 hours using live cell  
406 imaging monitored by Incucyte S3 (Figure 4A). Both P-48 and P-97 viruses developed CPE

407 more slowly than WT, as anticipated from the earlier replicon experiments (Figure 4A). For  
408 comparison, while a D-148 virus bearing a larger deletion from the distal end of the S fragment  
409 stem-loop replicated at a slower rate than the WT virus, D-148 replicated significantly faster  
410 than viruses carrying deletions at the proximal end of the S fragment (i.e., P-48 and P-97;  
411 Figure 4A); further confirming replicon experiments. Ability of the viruses to form plaques  
412 was also assessed. Both, P-48 and P-97 mutants generated significantly smaller plaques when  
413 comparing to WT and/or D-148 mutant virus (Figure 4B).

414

415 Sequencing of recovered viruses revealed one isolate with mutations in 2C, which were not  
416 investigated further. In addition, a single mutation in the 3D<sup>pol</sup> sequence was found in a high  
417 proportion of the viral progeny of one of three P-97 viral replicates. The A7203C change  
418 resulted in I189L mutation in the 3D<sup>pol</sup> protein amino acid sequence. The evolution of this  
419 mutation was investigated further by sequencing viruses from earlier passages. The proportion  
420 of the I189L mutation in the population increased from 40% at passage 3 to 51% at passage 4,  
421 and 61% at passage 5, suggesting it confers a selective advantage in the context of the proximal  
422 S fragment stem-loop deletion and so is sequentially enriched. With four exceptions (two  
423 isolates containing valine and two isolates containing threonine at this position) out of 1123  
424 sequences of 3D<sup>pol</sup> available, all known FMDV isolates have isoleucine at this position (Figure  
425 S3), making the amino acid substitution for leucine novel. . This residue is known to interact  
426 with template RNA (Figure 5A), playing a crucial role during viral replication (60). No such  
427 mutations were observed in the WT or the P-48 mutant viruses after passage.

428

429

430 **Effect of the 3D<sup>pol</sup> I189L compensatory mutation on replicon replication.**

431 The 3D<sup>pol</sup> I189L mutation was introduced into WT, GNN and P-97 replicons by site-specific  
432 mutagenesis and the consequence for replication assessed by reporter gene expression  
433 following transfection into BHK-21 cells, as above. Introduction of 3D<sup>pol</sup> I189L into the WT  
434 replicon had no significant effect on replication, however, a small but significant increase in  
435 replication was observed when it was introduced into the P-97 replicon (Figure 5B). As  
436 expected, I189L was unable to restore the activity of the GNN negative control.

437

438 **I189L modifies 3D<sup>pol</sup> activity.**

439 The influence of the 3D<sup>pol</sup> I189L mutation on polymerase function was investigated using  
440 Sym/Sub assay; a highly sensitive method for interrogating polymerase activity. Sym/Sub  
441 assays have been used to study PV replication and enable extension of a radiolabelled template  
442 to be measured at the single nucleotide level (48). The method uses a 10-nucleotide template  
443 oligonucleotide which base-pairs to create a small double stranded region with a four  
444 nucleotide 5' overhang, thus allowing 3' nucleotide addition. In the presence of rNTPs and  
445 recombinantly expressed 3D<sup>pol</sup>, the addition of single or multiple nucleotides can be assessed  
446 over time by separating input template and elongation products by PAGE (Figure 6A). Initially,  
447 an assay using ATP only was undertaken to probe the ability of the enzyme to add a single  
448 nucleotide. WT and I189L 3D<sup>pol</sup> proteins behaved similarly in the assay with no significant  
449 differences in the rate of addition of the single nucleotide (Figure 6B & C).

450

451 3D<sup>pol</sup> activity was examined further by including all four rNTPs into the Sym/Sub assay. The  
452 design of the Sym/Sub oligonucleotide allows for elongation by a maximum of +4 nucleotides

453 to produce a fully double stranded product (Figure 7A). Both the WT and the I189L 3D<sup>pol</sup>  
454 enzymes produced the expected +4 product and, in addition, a longer product equivalent to +12  
455 nucleotides was produced by both polymerases (as calculated by Rf value for migration  
456 travelled) (Figure 7B). This is, reminiscent of the larger products seen in recombination assays  
457 reported in the investigation of PV 3D<sup>pol</sup> (48, 61). Although there was no measurable difference  
458 in rate of addition of the four nucleotides by WT or mutant enzyme, I189L 3D<sup>pol</sup> produced the  
459 larger +12 product in greater quantity and faster (Figure 7C & D).

460

461 The functions of WT and I189L 3D<sup>pol</sup> enzymes were dissected in finer detail by examining  
462 incremental addition of rNTP combinations to Sym/Sub assay in the order ATP, UTP, GTP  
463 and CTP. The reactions were incubated for 300 seconds (as above) before separation by  
464 electrophoresis. Addition of ATP alone produced a distinct +1 band, as previously described  
465 (Figure 8A). The addition of ATP and UTP together produced a +2 product in addition to lower  
466 intensity bands corresponding to +3 and +4 nucleotides. Inclusion of ATP, UTP and GTP  
467 resulted in a strong band equivalent to +3 product in addition to a minor +4 band. All four  
468 rNTPs produced a +4 band, as expected (Figure 8A). The appearance of the additional bands  
469 in reactions where some rNTPs were missing indicates misincorporation into the growing  
470 strand. We examined the error-rates of WT and I189L 3D<sup>pol</sup> by measuring the relative amount  
471 of misincorporated +4 product and found no significant difference between the two enzymes  
472 (Figure 8B).

473

474 Differences in misincorporation by the WT and I189L mutant polymerase were investigated  
475 further by assessing the effects of ribavirin on replicons bearing either of the two enzymes as  
476 increased misincorporation rates should result in increased sensitivity to the nucleoside

477 analogue. However, no differences were seen in the sensitivity of the WT, P-97 and P-97 3D<sup>pol</sup>  
478 I189L replicons in the presence of up to 1 mM ribavirin (Figure 8C). Therefore, it appears that  
479 differences in error rate were unlikely to be responsible for the production of increased amounts  
480 of the larger +12 product by the I189L 3D<sup>pol</sup> (Figure 7C and Figure 8D).

481

## 482 **Discussion**

483 In comparison to other picornaviruses, the 5' UTR of FMDV is uniquely large and complex,  
484 comprising several distinct structural domains, the functions of most of which are poorly  
485 understood. The first *c.* 360 nucleotides are predicted to form a single, long stem-loop called  
486 the S fragment (22). Although supported by functional studies, to our knowledge the secondary  
487 structure of the S fragment has not been determined biochemically (25). Here, using SHAPE  
488 chemistry applied to a sequence of a well-studied FMDV isolate (O1 Kaufbeuren) (35), we  
489 confirm that the S fragment folds into a single, long stem-loop containing several bulges  
490 formed by unpaired nucleotides. The importance of some of these bulges for viral viability was  
491 determined previously (25).

492

493 Despite the high sequence and length variability of the S fragment observed in FMDV field  
494 isolates, most viruses maintain the full-length stem-loop (10). This suggests a strong  
495 evolutionary pressure to maintain the structure. The S fragment is known to interact with viral  
496 and cellular proteins and the 3' UTR, likely facilitating circulation of the viral genome during  
497 replication (64–66). However, there is evidence that some deletions to the distal part of the S  
498 fragment are tolerated and a number of unrelated field isolates from different FMDV serotypes  
499 (e.g., A, C and O) have been shown to carry deletions in their S fragments. These deletions  
500 arose independently and range in length from few to 76 nucleotides (10, 26, 62). Unlike

501 deletions found in other parts of the FMDV genome (e.g., deletions found in the region  
502 encoding 3A), those found in the S fragment do not appear to be host specific, with viruses  
503 carrying deletions within the S fragment being isolated from both cattle and pig (10, 26, 62,  
504 63). A more recent study showed that deletion of 164 nucleotides from the distal part of the S  
505 fragment can produce a viable, although attenuated virus, suggesting a role in evasion of innate  
506 immunity, at least partially explaining the evolutionary trend to maintain the full structure of  
507 the S fragment by field viruses (25). Here, we show that although deletion of 246 nucleotides  
508 or more from the distal region on the S fragment is not tolerated mutants carrying deletions D-  
509 70 and D-148 remain replication-competent.

510

511 The proximal part of the S fragment stem-loop shows higher sequence and nucleotide pairing  
512 conservation compared to the distal region (Figure 3). Surprisingly, deletions to the proximal  
513 part of the stem-loop (i.e., up to 97 nucleotides) are also tolerated, although to a lesser extent  
514 than distal deletions, resulting in both attenuated replicons and viruses (cf P-48 and P-97  
515 mutants versus D-148 mutant, Figure 2 and 4) (10). Interestingly, while the replication of D-  
516 148 mutant replicon was more impaired in MDBK cells than in the BHK-21 cells, this cell-  
517 specific difference was not seen for the viable replicons carrying deletions to the proximal part  
518 of the S fragment stem-loop. Since, unlike BHK-21 cells, MDBK cells appear to have a  
519 functional interferon pathway this might suggest that, although required for viral replication,  
520 this proximal part of the S fragment stem-loop does not play a part in the evasion of the innate  
521 immunity (56, 57).

522

523 Of three viral isolates carrying the maximum viable proximal deletion to the S fragment (P-  
524 97), two resulted in selective enrichment of a compensatory mutation over serial passages. In

525 both cases, the mutations showed a trend towards fixation. One isolate developed a number of  
526 mutations in 2C (data not shown), while another developed a single I189L mutation in a highly  
527 conserved site of 3D<sup>pol</sup> known to form hydrophobic contact with a nucleotide base within  
528 template RNA during viral replication (60). Given the essential role of isoleucine 189 in viral  
529 RNA replication, we investigated the effect of the I189L mutation on replication and RNA  
530 strand synthesis. In fact, introduction of I189L into the P-97 replicon enhanced its replication,  
531 suggesting an advantageous effect of this mutation. Although further biochemical analysis of  
532 the I189L 3D<sup>pol</sup> mutant did not show an altered rate of nucleotide incorporation when compared  
533 to the WT polymerase, it did produce more of a 12-nucleotide long product. Such long products  
534 were observed in similar reactions for the 3D<sup>pol</sup> of PV and were the result of a nucleotide mis-  
535 incorporation and template switch (48, 67, 68). While the 12-nucleotide long product most  
536 likely occurred due to nucleotide misincorporation, there is no evidence for altered fidelity of  
537 the I189L mutant. Whether this product occurred as the result of strand slippage, or a template  
538 switch remains to be investigated. Nevertheless, development of the compensatory mutation  
539 over a serial passage in a virus carrying maximal viable proximal deletion to the S fragment  
540 structure, and the advantageous effect of this mutation on replicon replication suggests the  
541 possibility of (direct or indirect) interaction between the S fragment and the viral polymerase  
542 (or its precursor). Further studies are required to verify this interplay.

543

544 In conclusion, using biochemical methods, we confirmed previously proposed secondary  
545 structure of the S fragment of FMDV. Despite its higher sequence and nucleotide pairing  
546 conservation, small deletions to the proximal part of the S fragment stem-loop are viable,  
547 although resulting in attenuated replicons and viruses. An advantageous compensatory  
548 mutation within a highly conserved site of 3D<sup>pol</sup> appeared during serial passage of a viral isolate



549 bearing the largest viable mutation to the proximal part of the S fragment, suggests potential  
550 interplay between the S fragment and the viral polymerase.

551

552

553

#### 554 **Acknowledgements**

555 This work was supported by funding from the Biotechnology and Biological Sciences Research  
556 Council (BBSRC) of the United Kingdom (research grant BB/K003801/1). Additionally, The  
557 Pirbright Institute receives grant-aided support from the BBSRC (projects BBS/E/I/00007035,  
558 BBS/E/I/00007036 and BBS/E/I/00007037) and the UK Department for the Environment,  
559 Food and Rural Affairs (Defra project SE2945).

- 560 1. Lulla V, Dinan AM, Hosmillo M, Chaudhry Y, Sherry L, Irigoyen N, Nayak KM,  
561 Stonehouse NJ, Zilbauer M, Goodfellow I, Firth AE. 2019. An upstream protein-  
562 coding region in enteroviruses modulates virus infection in gut epithelial cells. *Nat*  
563 *Microbiol* 4:280–292.
- 564 2. Roos, RP, Kong W-P, Semler BL. 1989. Polyprotein processing of Theiler's murine  
565 encephalomyelitis virus. *J Virol* 63:5344.
- 566 3. Martínez-Salas E, Francisco-Velilla R, Fernandez-Chamorro J, Lozano G, Diaz-  
567 Toledano R. 2015. Picornavirus IRES elements: RNA structure and host protein  
568 interactions. *Virus Res* 206:62–73.
- 569 4. Lopez de Quinto S. 2002. IRES-driven translation is stimulated separately by the  
570 FMDV 3'-NCR and poly(A) sequences. *Nucleic Acids Res* 30:4398–4405.
- 571 5. Chard LS, Kaku Y, Jones B, Nayak A, Belsham GJ. 2006. Functional analyses of RNA  
572 structures shared between the internal ribosome entry sites of hepatitis C virus and the  
573 picornavirus porcine teschovirus 1 Talfan. *J Virol* 80:1271–1279.
- 574 6. Mason PW, Bezborodova S V, Henry TM. 2002. Identification and characterization of  
575 a cis-acting replication element (cre) adjacent to the internal ribosome entry site of  
576 foot-and-mouth disease virus. *J Virol* 76:9686–94.
- 577 7. Goodfellow IG, Kerrigan D, Evans DJ. 2003. Structure and function analysis of the  
578 poliovirus cis-acting replication element (CRE). *RNA* 9:124–137.
- 579 8. Goodfellow I, Chaudhry Y, Richardson A, Meredith J, Almond JW, Barclay W, Evans  
580 DJ. 2000. Identification of a cis-acting replication element within the poliovirus coding  
581 region. *J Virol* 74:4590–600.
- 582 9. Barton DJ, O'Donnell BJ, Flanagan JB. 2001. 5' cloverleaf in poliovirus RNA is a cis-  
583 acting replication element required for negative-strand synthesis. *EMBO J* 20:1439–  
584 48.

- 585 10. Carrillo C, Tulman ER, Delhon G, Lu Z, Carreno A, Vagnozzi A, Kutish GF, Rock  
586 DL. 2005. Comparative genomics of foot-and-mouth disease virus. *J Virol* 79:6487–  
587 504.
- 588 11. Carocci M, Bakkali-Kassimi L. 2012. The encephalomyocarditis virus. *Virulence*  
589 3:351–67.
- 590 12. Drexler JF, Corman VM, Lukashev AN, Van Den Brand JMA, Gmyl AP, Brunink S,  
591 Rasche A, Seggawi N, Feng H, Leijten LM, Vallo P, Kuiken T, Dotzauer A, Ulrich  
592 RG, Lemon SM, Drosten C, Akoua-Koffi CG, Ameneiros RS, Goodman SM,  
593 Godlevska E V., Tungaluna GCG, Görföl T, Hassanin A, Koivogui L, Krüger DH,  
594 Lakim MB, Lavrenchenko L, Leroy EM, Matthee S, ter Meulen J, Adu-Sarkodie Y,  
595 Oppong S, Preiser W, Pereira MJR, Reusken CBEM, Schneider J, Schmidt-Chanasit J,  
596 Fichet-Calvet E, Seebens-Hoyer A, Gloza-Rausch F, Setién AA, Tschapka M, Wells  
597 K, Wegner T, Wilkinson DA. 2015. Evolutionary origins of hepatitis A virus in small  
598 mammals. *Proc Natl Acad Sci U S A* 112:15190–15195.
- 599 13. Knight-Jones TJD, Rushton J. 2013. The economic impacts of foot and mouth disease  
600 – What are they, how big are they and where do they occur? *Prev Vet Med* 112:161–  
601 173.
- 602 14. Mahapatra M, Parida S. 2018. Foot and mouth disease vaccine strain selection: current  
603 approaches and future perspectives. *Expert Rev Vaccines* 17:577–591.
- 604 15. Park J-H. 2013. Requirements for improved vaccines against foot-and-mouth disease  
605 epidemics. *Clin Exp Vaccine Res* 2:8–18.
- 606 16. Stenfeldt C, Eschbaumer M, Rekant SI, Pacheco JM, Smoliga GR, Hartwig EJ,  
607 Rodriguez LL, Arzt J. 2016. The Foot-and-Mouth Disease Carrier State Divergence in  
608 Cattle. *J Virol* 90:6344–64.
- 609 17. Sweeney TR, Cisnetto V, Bose D, Bailey M, Wilson JR, Zhang X, Belsham GJ, Curry

- 610 S. 2010. Foot-and-mouth disease virus 2C is a hexameric AAA+ protein with a  
611 coordinated ATP hydrolysis mechanism. *J Biol Chem* 285:24347–24359.
- 612 18. Teterina NL, Gorbalenya AE, Egger D, Bienz K, Rinaudo MS, Ehrenfeld E. 2006.  
613 Testing the modularity of the N-terminal amphipathic helix conserved in picornavirus  
614 2C proteins and hepatitis C NS5A protein. *Virology* 344:453–467.
- 615 19. Bienz K, Egger D, Troxler M, Pasamontes L. 1990. Structural organization of  
616 poliovirus RNA replication is mediated by viral proteins of the P2 genomic region. *J*  
617 *Virol* 64:1156–1163.
- 618 20. Black DN, Stephenson P, Rowlands DJ, Brown F. 1979. Sequence and location of the  
619 poly C tract in aphtho- and cardiovirus RNA. *Nucleic Acids Res* 6:2381–2390.
- 620 21. Mellor EJC, Brown F, Harris TJR. 1985. Analysis of the Secondary Structure of the  
621 Poly(C) Tract in Foot-and-Mouth Disease Virus RNAs. *J Gen Virol* 66:1919–1929.
- 622 22. Clarke BE, Brown AL, Currey KM, Newton SE, Rowlands DJ, Carroll AR. 1987.  
623 Potential secondary and tertiary structure in the genomic RNA of foot and mouth  
624 disease virus. *Nucleic Acids Res* 15:7067–7079.
- 625 23. Ward JC, Lasecka-Dykes L, Neil C, Adeyemi OO, Gold S, McLean-Pell N, Wright C,  
626 Herod MR, Kealy D, Warner E, Jackson T, King DP, Tuthill TJ, Rowlands DJ,  
627 Stonehouse NJ. 2022. The RNA pseudoknots in foot-and-mouth disease virus are  
628 dispensable for genome replication, but essential for the production of infectious virus.  
629 *PLOS Pathog* 18:e1010589.
- 630 24. Lasecka-Dykes L, Wright CF, Di Nardo A, Logan G, Mioulet V, Jackson T, Tuthill  
631 TJ, Knowles NJ, King DP. 2018. Full Genome Sequencing Reveals New Southern  
632 African Territories Genotypes Bringing Us Closer to Understanding True Variability  
633 of Foot-and-Mouth Disease Virus in Africa. *Viruses* 10.
- 634 25. Kloc A, Diaz-San Segundo F, Schafer EA, Rai DK, Kenney M, de los Santos T,

- 635 Rieder E. 2017. Foot-and-mouth disease virus 5'-terminal S fragment is required for  
636 replication and modulation of the innate immune response in host cells. *Virology*  
637 512:132–143.
- 638 26. Valdazo-González B, Timina A, Scherbakov A, Abdul-Hamid N, Knowles NJ, King  
639 DP. 2013. Multiple introductions of serotype O foot-and-mouth disease viruses into  
640 East Asia in 2010–2011. *Vet Res* 44:76.
- 641 27. Xiang W, Harris K, Alexander L, Wimmer E. 1995. Interaction between the 5'-  
642 terminal cloverleaf and 3AB/3CDpro of poliovirus is essential for RNA replication. *J*  
643 *Virol* 69:3658–3667.
- 644 28. Serrano P, Pulido MR, Sáiz M, Martínez-Salas E. 2006. The 3' end of the foot-and-  
645 mouth disease virus genome establishes two distinct long-range RNA-RNA  
646 interactions with the 5' end region. *J Gen Virol* 87:3013–22.
- 647 29. Forrest S, Lear Z, Herod MR, Ryan M, Rowlands DJ, Stonehouse NJ. 2014. Inhibition  
648 of the foot-and-mouth disease virus subgenomic replicon by RNA aptamers. *J Gen*  
649 *Virol* 95:2649–57.
- 650 30. Tulloch F, Pathania U, Luke GA, Nicholson J, Stonehouse NJ, Rowlands DJ, Jackson  
651 T, Tuthill T, Haas J, Lamond AI, Ryan MD. 2014. FMDV replicons encoding green  
652 fluorescent protein are replication competent. *J Virol Methods* 209C:35–40.
- 653 31. Herod MR, Ferrer-Orta C, Loundras E-A, Ward JC, Verdaguer N, Rowlands DJ,  
654 Stonehouse NJ. 2016. Both cis and trans Activities of Foot-and-Mouth Disease Virus  
655 3D Polymerase Are Essential for Viral RNA Replication. *J Virol* 90:6864–6883.
- 656 32. Ferrer-Orta C, Arias A, Perez-Luque R, Escarmís C, Domingo E, Verdaguer N. 2004.  
657 Structure of foot-and-mouth disease virus RNA-dependent RNA polymerase and its  
658 complex with a template-primer RNA. *J Biol Chem* 279:47212–21.
- 659 33. Bentham M, Holmes K, Forrest S, Rowlands DJ, Stonehouse NJ. 2012. Formation of

- 660 Higher-Order Foot-and-Mouth Disease Virus 3Dpol Complexes Is Dependent on  
661 Elongation Activity. *J Virol* 86:2371–2374.
- 662 34. Herod MR, Tulloch F, Loundras E-A, Ward JC, Rowlands DJ, Stonehouse NJ. 2015.  
663 Employing transposon mutagenesis to investigate foot-and-mouth disease virus  
664 replication. *J Gen Virol* 96:3507–3518.
- 665 35. Herod MR, Gold S, LaseckaDykes L, Wright C, Ward JC, McLean TC, Forrest S,  
666 Jackson T, Tuthill TJ, Rowlands DJ, Stonehouse NJ. 2017. Genetic economy in  
667 picornaviruses: Foot-and-mouth disease virus replication exploits alternative precursor  
668 cleavage pathway. *PLOS Pathog* 13:e1006666.
- 669 36. Lorenz R, Bernhart SH, Höner zu Siederdisen C, Tafer H, Flamm C, Stadler PF,  
670 Hofacker IL. 2011. ViennaRNA Package 2.0. *Algorithms Mol Biol* 6:1–14.
- 671 37. King AMQ, Blakemore WE, Ellard FM, Drew J, Stuart DI. 1999. Evidence for the role  
672 of His-142 of protein 1C in the acid-induced disassembly of foot-and-mouth disease  
673 virus capsids. *J Gen Virol* 80:1911–1918.
- 674 38. Logan G, Freimanis GL, King DJ, Valdazo-González B, Bachanek-Bankowska K,  
675 Sanderson ND, Knowles NJ, King DP, Cottam EM. 2014. A universal protocol to  
676 generate consensus level genome sequences for foot-and-mouth disease virus and other  
677 positive-sense polyadenylated RNA viruses using the Illumina MiSeq. *BMC Genomics*  
678 15:828.
- 679 39. Acevedo A, Andino R. 2014. Library preparation for highly accurate population  
680 sequencing of RNA viruses. *Nat Protoc* 9:1760–1769.
- 681 40. GitHub - najoshi/sickle: Windowed Adaptive Trimming for fastq files using quality.
- 682 41. Peng Y, Leung HCM, Yiu SM, Chin FYL. 2012. IDBA-UD: a de novo assembler for  
683 single-cell and metagenomic sequencing data with highly uneven depth.  
684 *Bioinformatics* 28:1420–1428.

- 685 42. Altschul SF, Gish W, Miller W, Myers EW, Lipman DJ. 1990. Basic local alignment  
686 search tool. *J Mol Biol* 215:403–410.
- 687 43. Li H, Durbin R. 2010. Fast and accurate long-read alignment with Burrows–Wheeler  
688 transform. *Bioinformatics* 26:589–595.
- 689 44. Robinson JT, Thorvaldsdóttir H, Winckler W, Guttman M, Lander ES, Getz G,  
690 Mesirov JP. 2011. Integrative genomics viewer. *Nat Biotechnol* 29:24–26.
- 691 45. Li H, Durbin R. 2009. Fast and accurate short read alignment with Burrows-Wheeler  
692 transform. *Bioinformatics* 25:1754–1760.
- 693 46. Li H. 2013. Aligning sequence reads, clone sequences and assembly contigs with  
694 BWA-MEM.
- 695 47. Jackson T, Sheppard D, Denyer M, Blakemore W, King AMQ. 2000. The Epithelial  
696 Integrin  $\alpha\beta 6$  Is a Receptor for Foot-and-Mouth Disease Virus. *J Virol* 74:4949.
- 697 48. Arnold JJ, Cameron CE. 2000. Poliovirus RNA-dependent RNA polymerase  
698 (3D(pol)). Assembly of stable, elongation-competent complexes by using a  
699 symmetrical primer-template substrate (sym/sub). *J Biol Chem* 275:5329–36.
- 700 49. de la Higuera I, Ferrer-Orta C, Moreno E, de Ávila AI, Soria ME, Singh K, Caridi F,  
701 Sobrino F, Sarafianos SG, Perales C, Verdaguer N, Domingo E. 2018. Contribution of  
702 a Multifunctional Polymerase Region of Foot-and-Mouth Disease Virus to Lethal  
703 Mutagenesis. *J Virol* 92.
- 704 50. Lasecka-Dykes L, Tulloch F, Simmonds P, Luke GA, Ribeca P, Gold S, Knowles NJ,  
705 Wright CF, Wadsworth J, Azhar M, King DP, Tuthill TJ, Jackson T, Ryan MD. 2021.  
706 Mutagenesis Mapping of RNA Structures within the Foot-and-Mouth Disease Virus  
707 Genome Reveals Functional Elements Localized in the Polymerase (3Dpol)-Encoding  
708 Region. *mSphere* 6.
- 709 51. Kerpedjiev P, Hammer S, Hofacker IL. 2015. Forna (force-directed RNA): Simple and

- 710 effective online RNA secondary structure diagrams. *Bioinformatics* 31:3377–3379.
- 711 52. Schneider TD, Stephens RM. 1990. Sequence logos: a new way to display consensus  
712 sequences. *Nucleic Acids Res* 18:6097.
- 713 53. Crooks GE, Hon G, Chandonia JM, Brenner SE. 2004. WebLogo: a sequence logo  
714 generator. *Genome Res* 14:1188–1190.
- 715 54. Homan PJ, Favorov O V, Lavender CA, Kursun O, Ge X, Busan S, Dokholyan N V,  
716 Weeks KM. 2014. Single-molecule correlated chemical probing of RNA. *Proc Natl*  
717 *Acad Sci U S A* 111:13858–63.
- 718 55. Tulloch F, Pathania U, Luke GA, Nicholson J, Stonehouse NJ, Rowlands DJ, Jackson  
719 T, Tuthill T, Haas J, Lamond AI, Ryan MD. 2014. FMDV replicons encoding green  
720 fluorescent protein are replication competent. *J Virol Methods* 209:35–40.
- 721 56. Conzelmann KK. 2004. Reverse Genetics of Mononegavirales. *Curr Top Microbiol*  
722 *Immunol* 283:1–41.
- 723 57. Schlender J, Bossert B, Buchholz U, Conzelmann K-K. 2000. Bovine Respiratory  
724 Syncytial Virus Nonstructural Proteins NS1 and NS2 Cooperatively Antagonize  
725 Alpha/Beta Interferon-Induced Antiviral Response. *J Virol* 74:8234.
- 726 58. Luna VER, Luk ADH, Tyring SK, Hellman JM, Lefkowitz SS. 1984. Properties of  
727 bovine interferons. *Exp 1984 4012* 40:1410–1412.
- 728 59. Lasecka-Dykes L, Wright CF, Di Nardo A, Logan G, Mioulet V, Jackson T, Tuthill  
729 TJ, Knowles NJ, King DP. 2018. Full genome sequencing reveals new southern african  
730 territories genotypes bringing us closer to understanding true variability of foot-and-  
731 mouth disease virus in Africa. *Viruses* 10.
- 732 60. Ferrer-Orta C, Arias A, Perez-Luque R, Escarmís C, Domingo E, Verdaguer N. 2004.  
733 Structure of Foot-and-Mouth Disease Virus RNA-dependent RNA Polymerase and Its  
734 Complex with a Template-Primer RNA. *J Biol Chem* 279:47212–47221.



- 735 61. Woodman A, Arnold JJ, Cameron CE, Evans DJ. 2016. Biochemical and genetic  
736 analysis of the role of the viral polymerase in enterovirus recombination. *Nucleic*  
737 *Acids Res* 44:6883–95.
- 738 62. Mohapatra JK, Pawar SS, Tosh C, Subramaniam S, Palsamy R, Sanyal A, Hemadri D,  
739 Pattnaik B. 2011. Genetic characterization of vaccine and field strains of serotype A  
740 foot-and-mouth disease virus from India. *Acta Virol* 55:349–352.
- 741 63. Wright CF, Knowles NJ, Di Nardo A, Paton DJ, Haydon DT, King DP. 2013.  
742 Reconstructing the origin and transmission dynamics of the 1967–68 foot-and-mouth  
743 disease epidemic in the United Kingdom. *Infect Genet Evol* 20:230–238.
- 744 64. Lawrence P, Rieder E. 2009. Identification of RNA helicase A as a new host factor in  
745 the replication cycle of foot-and-mouth disease virus. *J Virol* 83:11356–66.
- 746 65. Rodríguez-Pulido M, Borrego B, Sobrino F, Sáiz M. 2011. RNA Structural Domains  
747 in Noncoding Regions of the Foot-and-Mouth Disease Virus Genome Trigger Innate  
748 Immunity in Porcine Cells and Mice. *J Virol* 85:6492.
- 749 66. Rodríguez Pulido M, Serrano P, Sáiz M, Martínez-Salas E. 2007. Foot-and-mouth  
750 disease virus infection induces proteolytic cleavage of PTB, eIF3a,b, and PABP RNA-  
751 binding proteins. *Virology* 364:466–474.
- 752 67. Woodman A, Arnold JJ, Cameron CE, Evans DJ. 2016. Biochemical and genetic  
753 analysis of the role of the viral polymerase in enterovirus recombination. *Nucleic*  
754 *Acids Res* 44:6883–6895.
- 755 68. Arnold JJ, Cameron CE. 1999. Poliovirus RNA-dependent RNA polymerase (3D(pol))  
756 is sufficient for template switching in vitro. *J Biol Chem* 274:2706–2716.  
757  
758

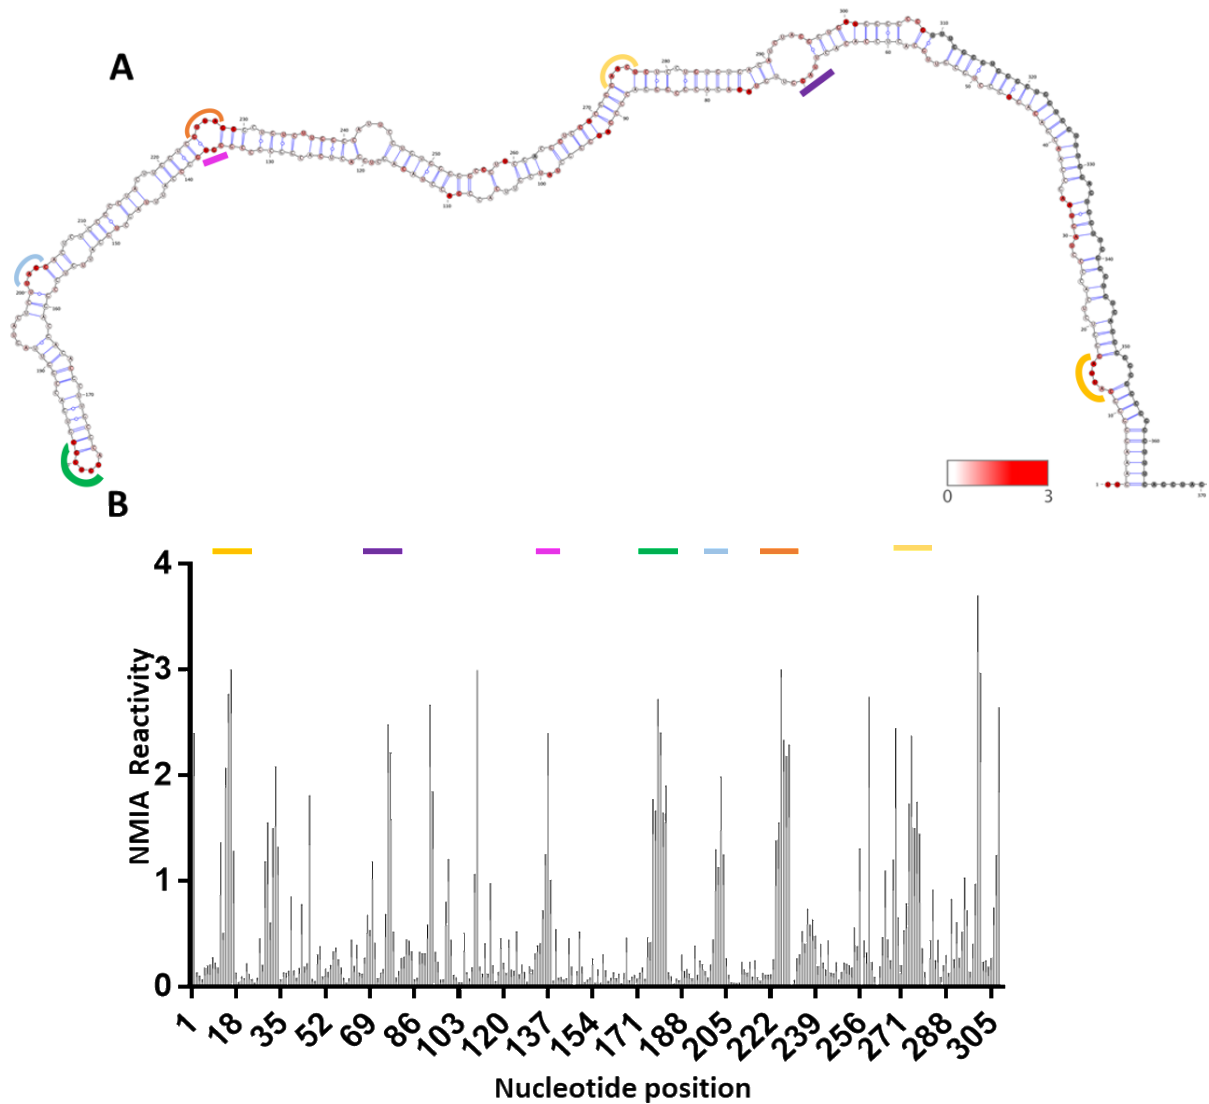

759

760

761 **Figure 1. SHAPE analysis of the S fragment. (A)** Superimposition of SHAPE reactivity on the *in silico*  
762 predicted secondary structure WT S fragment. Secondary structure was predicted using the Vienna  
763 RNA probing package and visualised using VARNA. NMIA reactivity is overlaid and represented on a  
764 colour scale from low (white) to high (red). Nucleotides for which there is no data are represented as  
765 grey. Coloured regions corresponding to the peaks in NIMIA reactivity are shown for ease of  
766 interpretation and localisation. **(B)** Individual nucleotide NMIA reactivity as analysed by SHAPE  
767 reactions and capillary electrophoresis. High reactivity indicates high probability of single-stranded  
768 regions i.e. non base-paired nucleotides. Data was analysed using QuSHAPE. Corresponding coloured  
769 regions are shown for some regions across **A** and **B** for ease of interpretation and localisation of SHAPE  
770 data to RNA structure. (n = 6, error bars represent SEM).

771

772

773

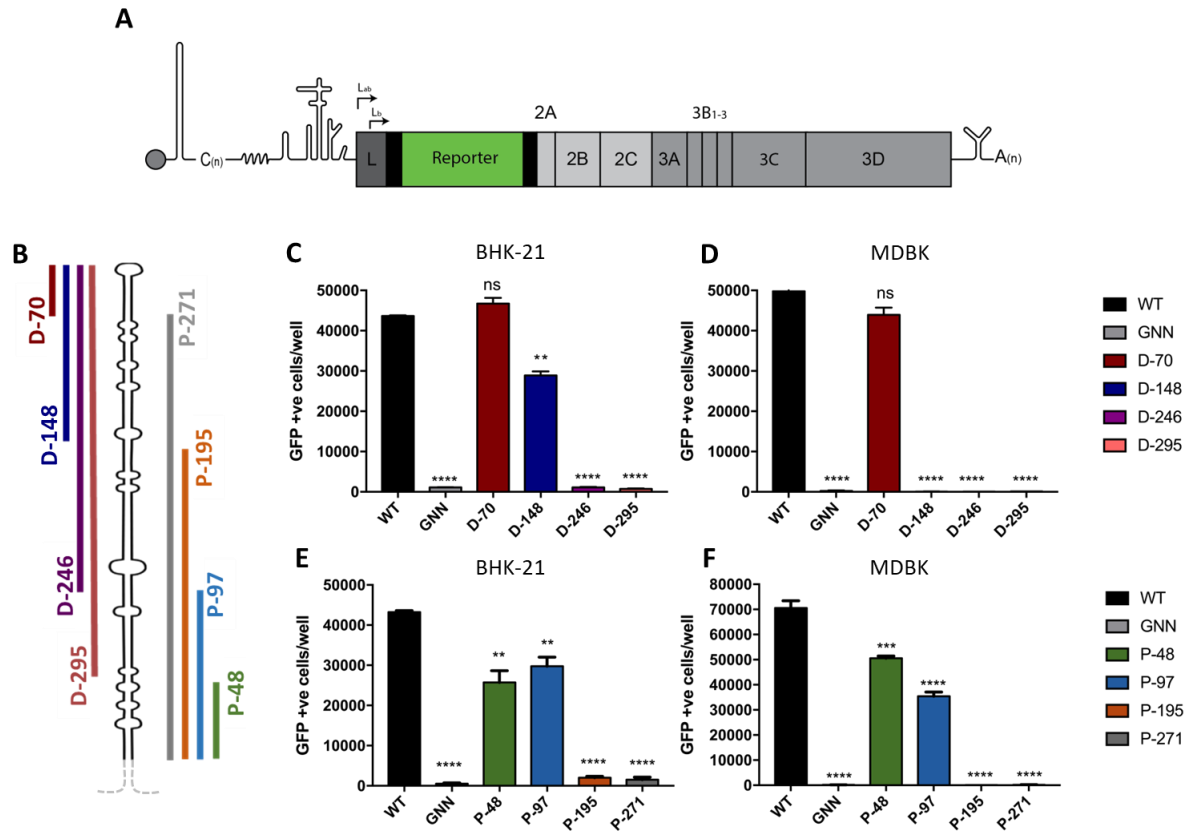

774

775

776 **Figure 2. Truncations to the distal and proximal regions of the S fragment can impair replication.**

777 **(A)** Cartoon schematic of FMDV O1K replicon with the region encoding the structural proteins replaced  
 778 with a GFP reporter. **(B)** Schematic representation of S fragment deletions. The maintained 3' and 5'  
 779 proximal (P) regions are represented by the dotted grey line and was constant in all deletions **(C-D)**  
 780 Replication of replicons with 70, 148, 246 and 295 nucleotides removed from the distal (D) region of  
 781 the S fragment was measured following transfection into BHK-21 cells or MDBK cells. Replication was  
 782 monitored by GFP expression using an IncuCyte, shown at 8 hours post-transfection alongside WT and  
 783 3D<sup>pol</sup> inactivating mutant 'GNN' acting as a positive and negative control, respectively. **(E-F)** Replication  
 784 of replicons with 48, 97, 195 and 271 nucleotides removed from the proximal region of the S fragment  
 785 and measured as in (C). (n = 3, error bars represent SEM) \*\* P<0.01, \*\*\*\* P<0.0001.

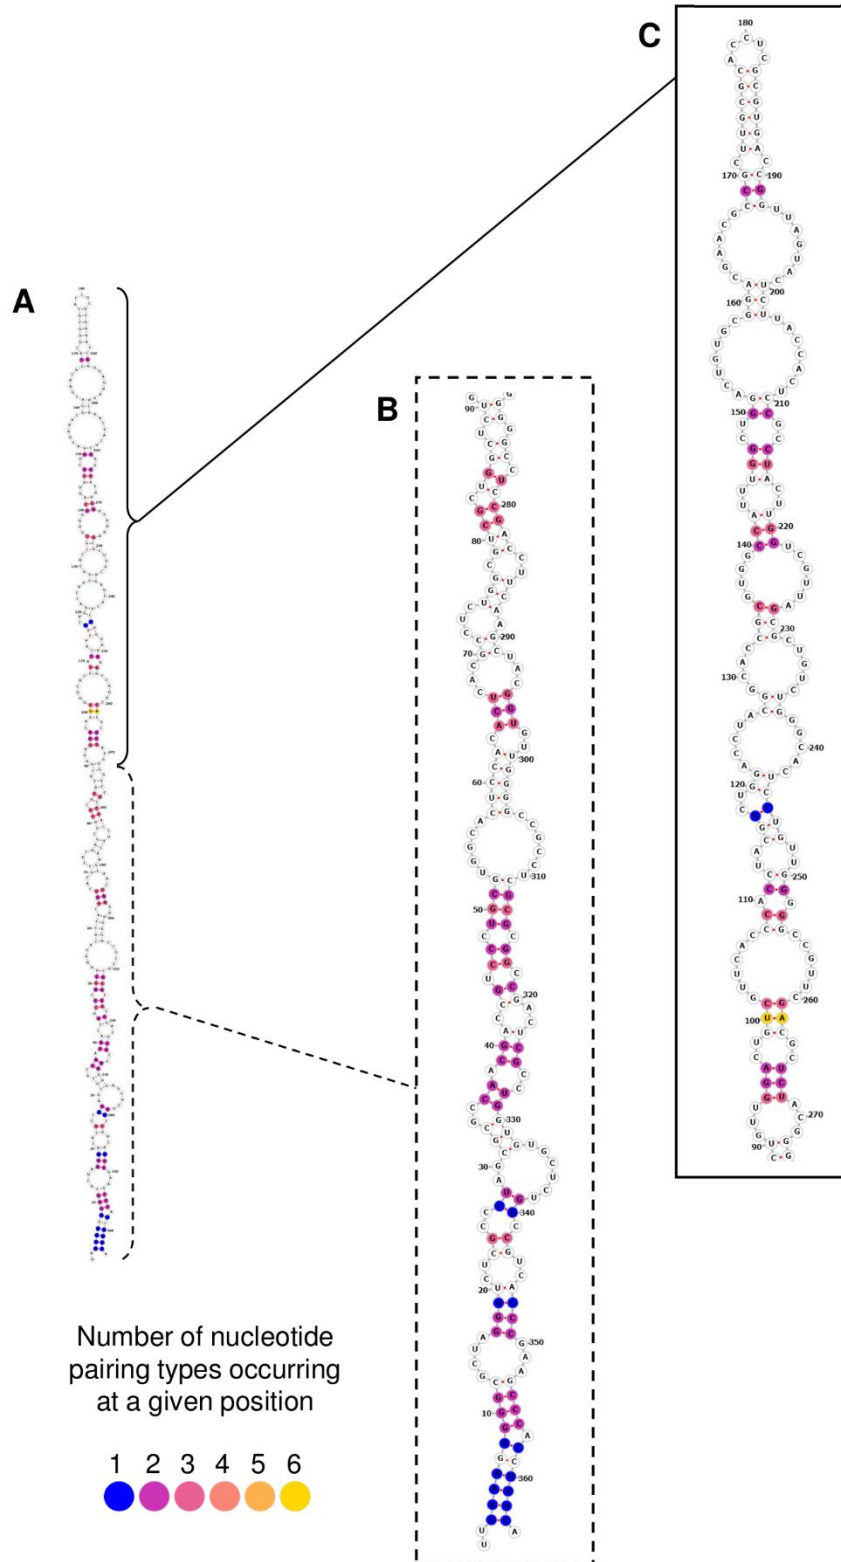

786

787 **Figure 3. The extent of nucleotide and pairing conservation within the S fragment of the FMDV. (A)**  
788 A schematic representation of conserved RNA structure of the S fragment in all 118 FMDV isolates.  
789 Nucleotide positions which form conserved pairing in 116/118 FMDV isolates were colour-coded  
790 according to number of pairing types (purple for 1 nucleotide pairing type at a given position and  
791 yellow for 6 nucleotide pairing types; see the colour matrix included at the left bottom corner of the

792 figure). There are six possible nucleotide pairings: A-U, G-C, G-U, U-A, C-G and U-G. Nucleotide pairings  
793 which were not conserved in three or more FMDV isolates, remained white. Due to the length of the  
794 S fragment stem-loop, the resolution of the image was not sufficient for detailed view of the individual  
795 nucleotide pairings and so the S fragment was artificially divided into two parts, proximal and distal,  
796 and the images of their schematic RNA structures enlarged (**B-C**). (**B**) The proximal part of the S  
797 fragment included nucleotide positions 1 to 90 and 272 to 364, (**C**) while the distal part included  
798 nucleotide positions 90 - 272. Numbers represent nucleotide positions of the S fragment sequence.

799

800

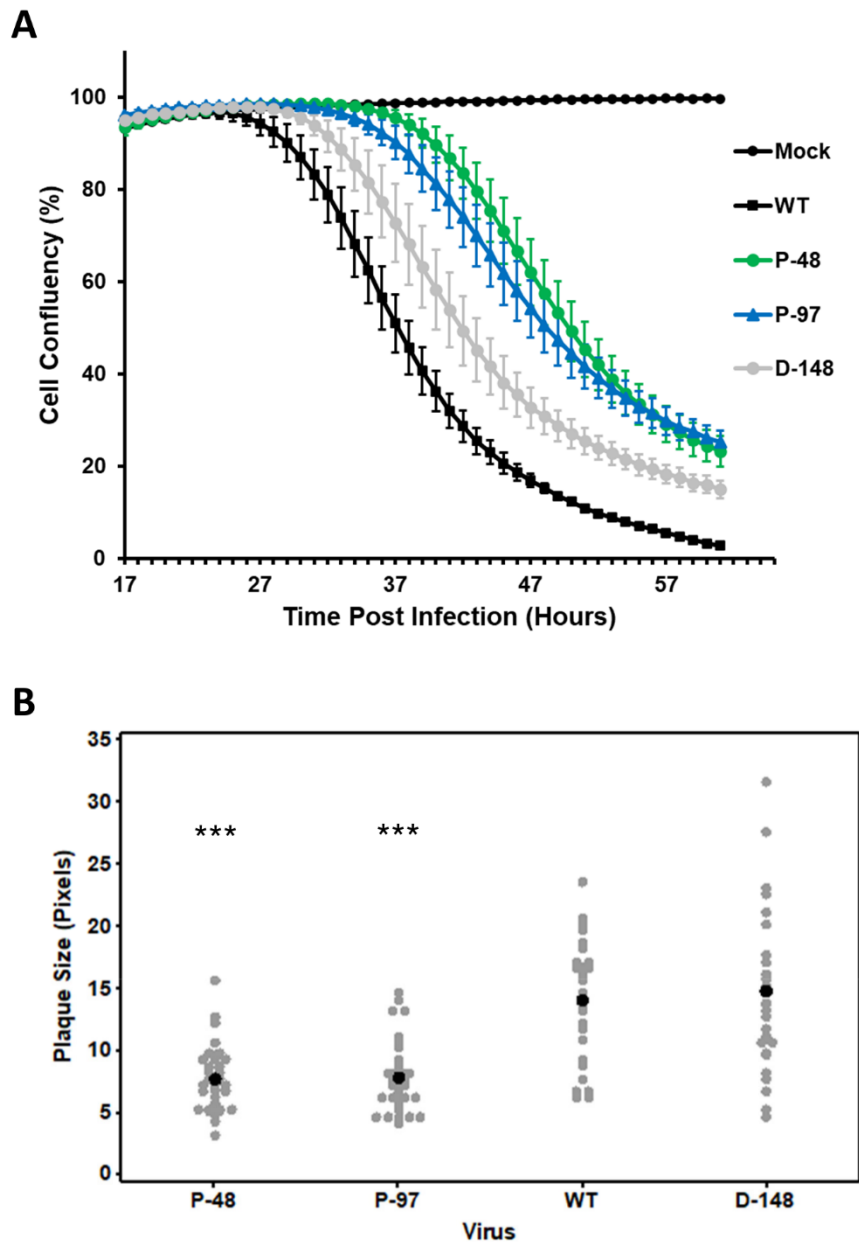

801  
802 **Figure 4. Fitness of FMDV containing a truncation at the proximal end of the S fragment. (A)**  
803 Recovered WT, P-48, P-97 and D-148 virus populations were used to infect BHK-21 cells at an MOI of  
804 0.01 PFU. CPE was monitored over time using live an IncuCyte S3 live cell imaging and is shown as a  
805 drop in cell confluency; (n =3 error bars represent SEM). **(B)** Plaque sizes of the WT, P-48, P-97 and  
806 D-148 variants grown on BHK-21 cells. Each wells containing plaques was scanned and the plaque size  
807 was estimated in pixels. All plaques were counted to avoid bias in plaque selection. Grey dots  
808 represent individual plaques, while black dot represents the mean; \*\*\* P < 0.001 when comparing to  
809 plaque size induced by the WT variant.

810

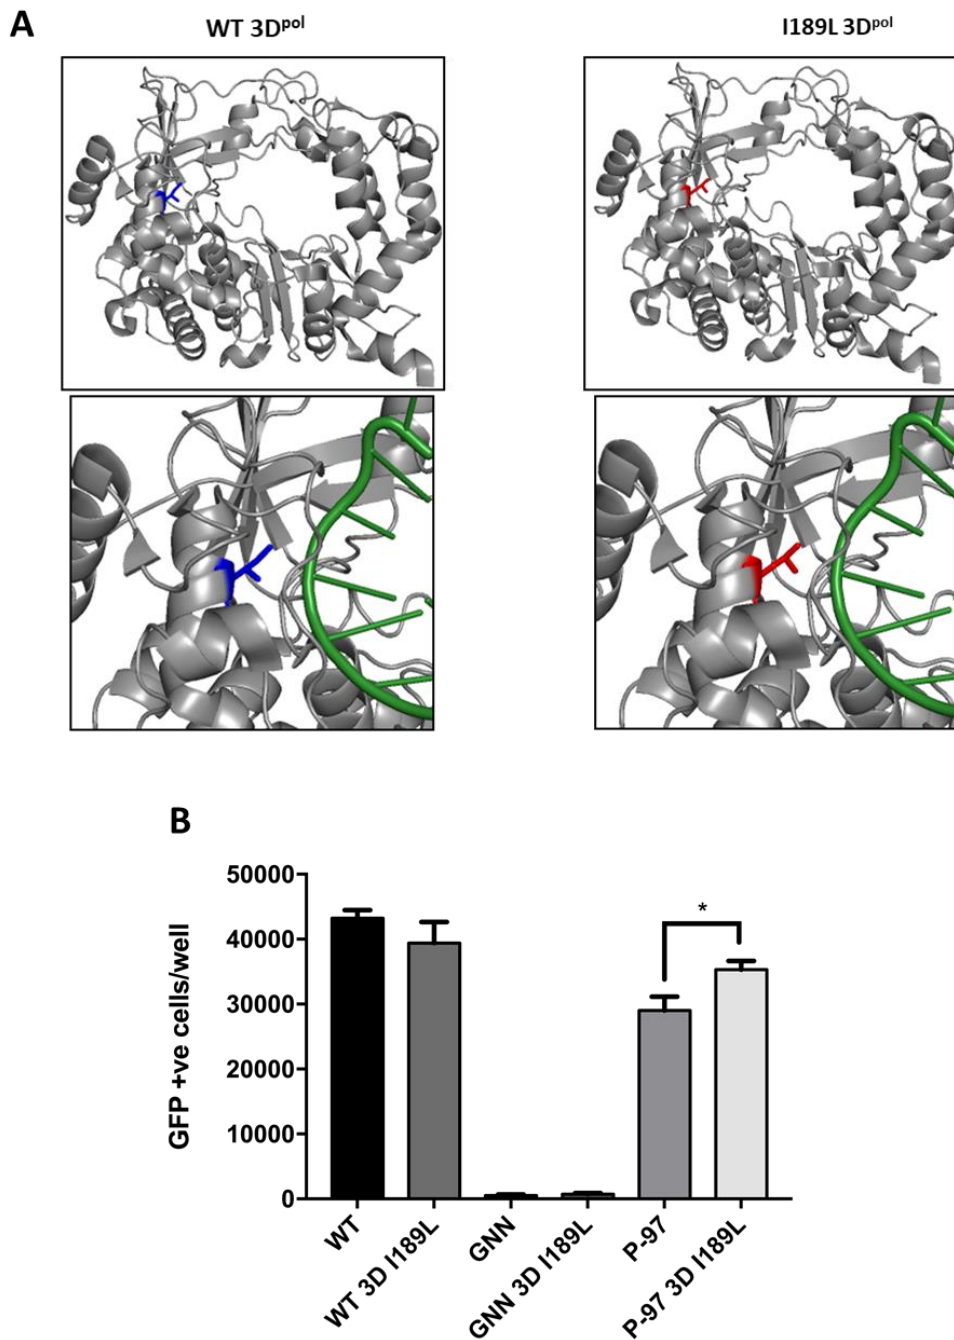

**Figure 5. Compensatory mutation I189L in the structure of 3D<sup>pol</sup> and its effect on replication of FMDV replicons. (A)** WT 3D<sup>pol</sup> crystal structure with I189 residue highlighted in blue, shown with (bottom, left) and without bound RNA (top, left). The I189L residue mutation was modelled onto the WT 3D<sup>pol</sup> crystal structure and highlighted in red (right). Structure shown with (bottom, right) and without (top, right) bound RNA. PDB file 1WNE. **(B)** The 3D<sup>pol</sup> I189L mutation was introduced into WT, GNN and P-97 replicons, termed WT I189L, GNN I189L and P-97 I189L respectively. Replicon RNA was transcribed and transfected into BHK-21 cells. WT and 3D<sup>pol</sup> GNN replicons were included as controls, with the latter for the level of input translation (n =3 error bars represent SEM, \* P < 0.05).

811

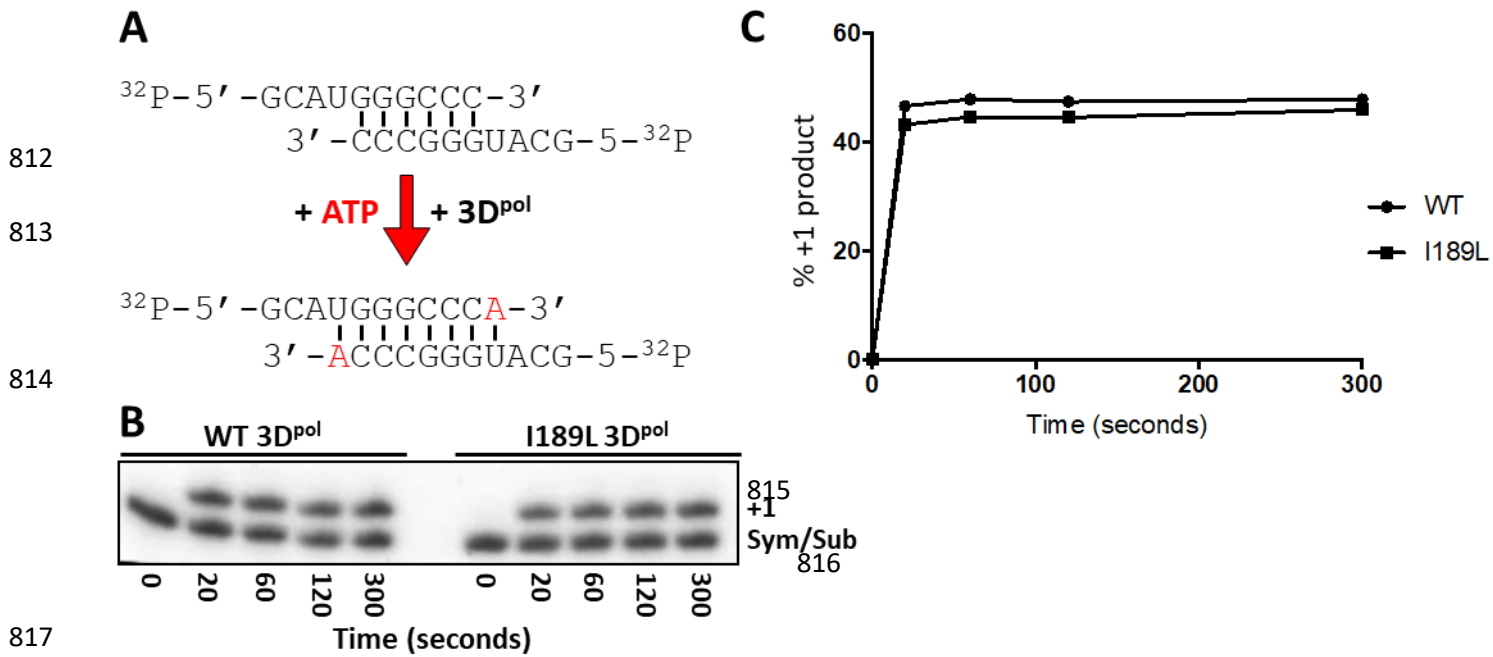

817

818 **Figure 6. Single nucleotide addition to a Sym/Sub substrate by WT and I189L 3Dpol.** (A) Schematic  
819 of the Sym/Sub experimental protocol. Radioactively end labelled RNA oligonucleotides are annealed  
820 before addition of rNTPs and recombinant 3D<sup>pol</sup>. (B) Extension of the 10mer Sym/Sub template with a  
821 single nucleotide (ATP) using either WT or I189L FMDV 3D<sup>pol</sup>. Aliquots of the reactions were taken at  
822 20, 60, 120 and 300 seconds, RNA fragments separated by electrophoresis and visualised using a  
823 phosphorimager. (C) Densitometry of +1 product is plotted as rate of addition of a single nucleotide  
824 shown over time, % +1 product refers to the total amount of input Sym/Sub template that was  
825 extended by 1 nucleotide.

826



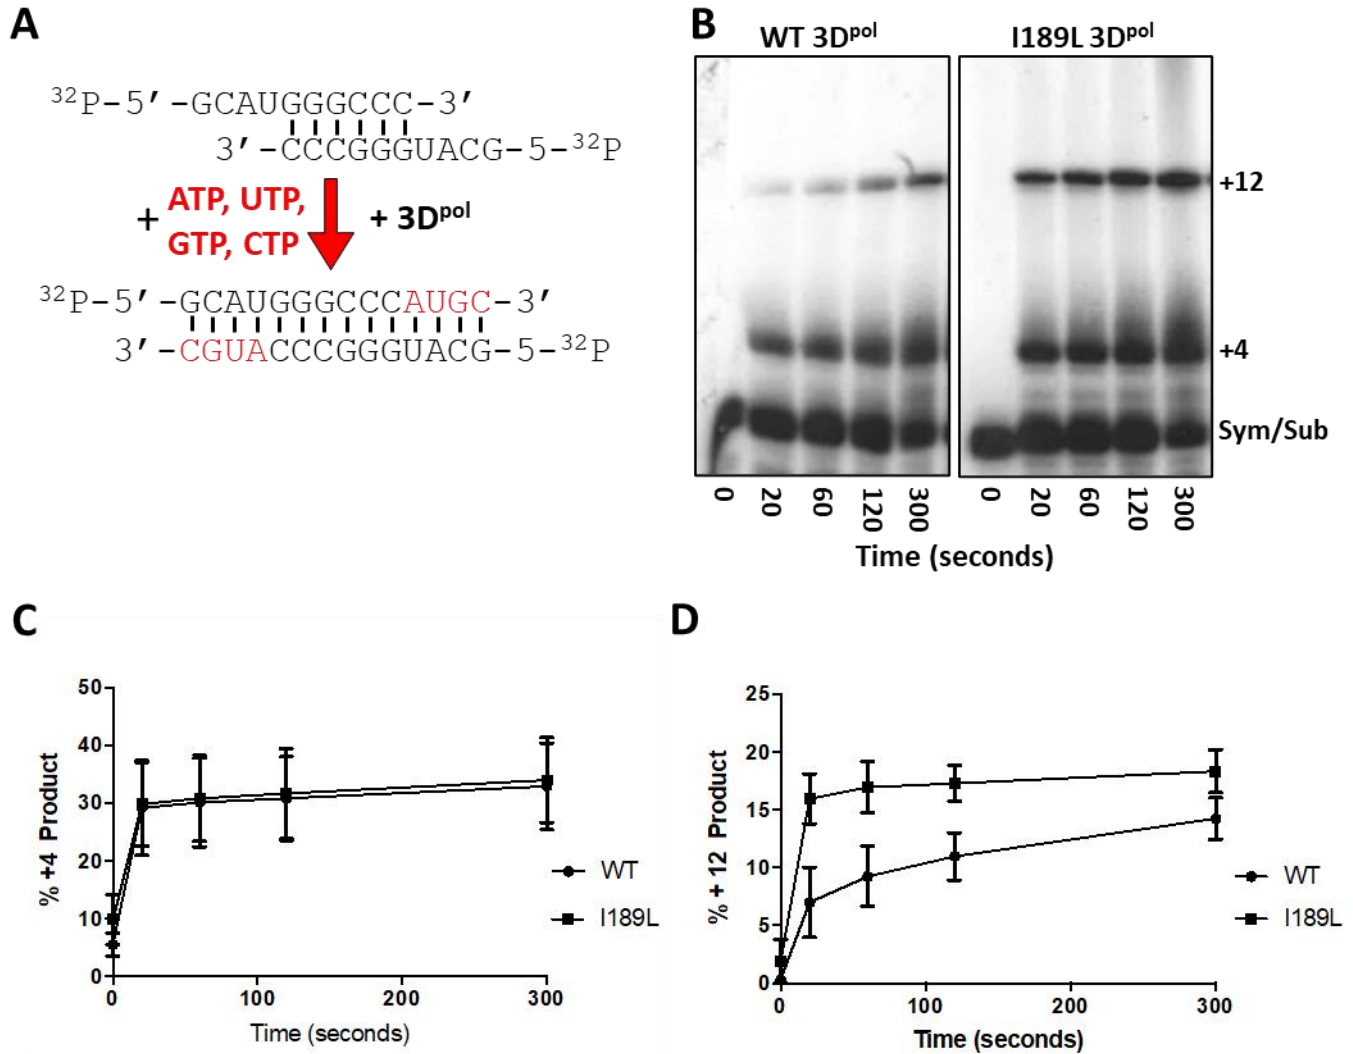

827

828

829

830 **Figure 7. Sym/Sub assays showing differences between WT and I189L 3D<sup>pol</sup> in the production of a ~**  
 831 **+12 nucleotide product. (A)** Schematic of the Sym/Sub experimental protocol using all four rNTPs. **(B)**  
 832 Extension of the 10mer Sym/Sub template with all four nucleotides using either WT or I189L  
 833 recombinant FMDV 3D<sup>pol</sup>. Aliquots of the reactions were taken at 20, 60, 120 and 300 seconds, RNA  
 834 fragments separated by electrophoresis and visualised using a phosphorimager. **(C)** Densitometry of  
 835 the production of the +4 product by either WT or I189L 3D<sup>pol</sup> over time. **(D)** Densitometry of the  
 836 production of the +12 product by either WT or I189L 3D<sup>pol</sup>. Data are shown as the % of the input  
 837 Sym/Sub template elongating to the +4 or +12 products (n = 3, error bars represent SEM).

838

839

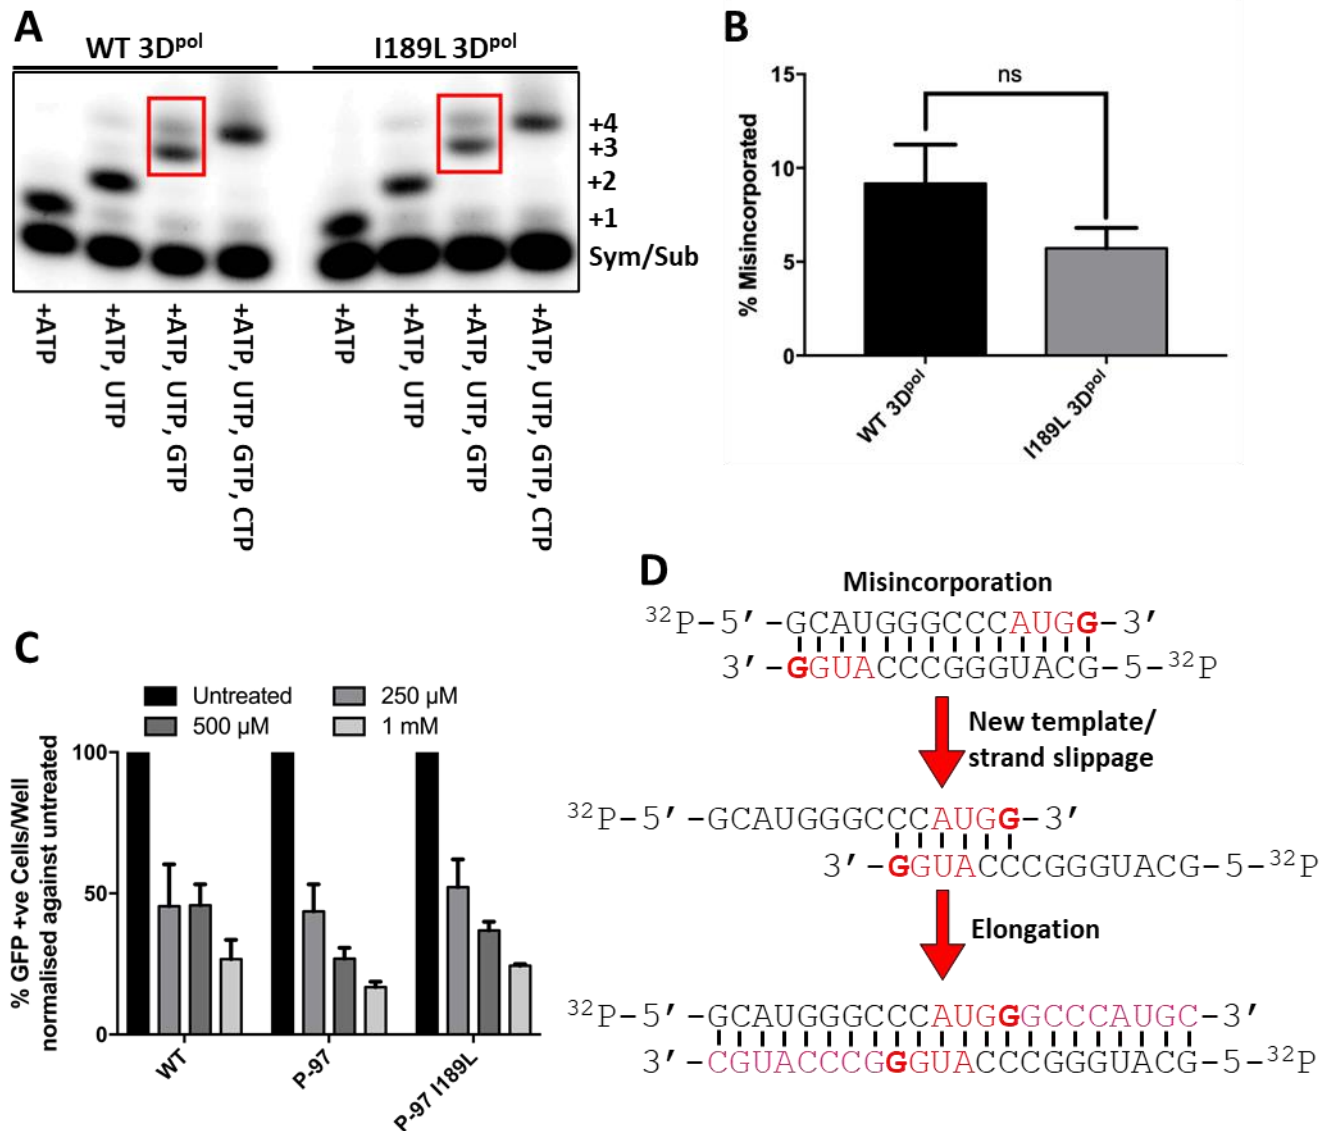

840

841 **Figure 8. Misincorporation by WT and I189L 3D<sup>pol</sup>.** (A) Sym/Sub experiments were repeated with the  
 842 addition of either ATP, ATP and UTP, ATP and UTP and GTP or all four rNTPs together. Reactions were  
 843 continued for 300 seconds before electrophoresis and visualization. Misincorporation of GTP to  
 844 generate a +4 product is highlighted by the red box. (B) Densitometry of the misincorporated GTP  
 845 shows no difference in the rate of misincorporation by WT or I189L 3D<sup>pol</sup>. (C) WT, P-97 and P-97 I189L  
 846 replicons were transfected into BHK-21 cells in the presence of up to 1 mM of ribavirin. Replication  
 847 was monitored by expression of the GFP reporter and shown here at 8 hours post-transfection. (D)  
 848 Schematic for potential mechanism for the generation of a +12 product. Since misincorporation can  
 849 occur at the fourth position allowing for the addition of a second guanosine residue, if templates were  
 850 to separate and reanneal by either strand slippage or annealing of a new template, extension could  
 851 result in the addition of 12 nucleotides (n = 3, error bars represent SEM).

852

853

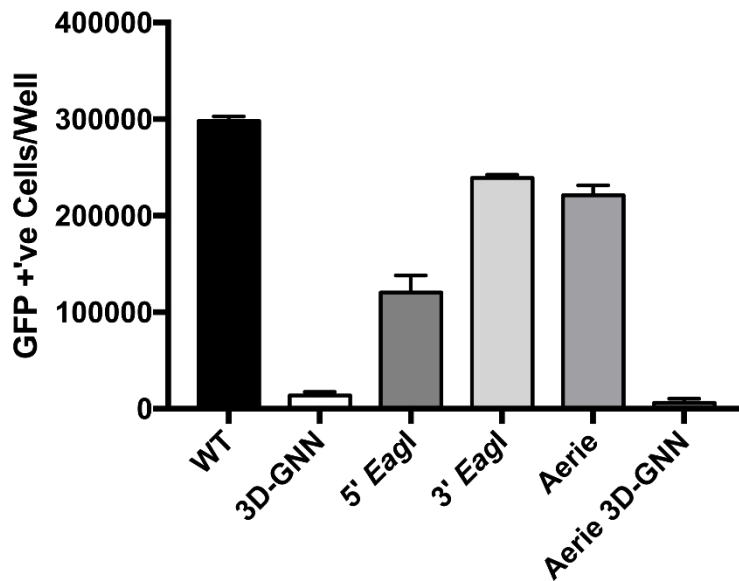

854

855 **Supplementary Figure S1. Effect of introduction of *Eagl* sites on replication.** Number of GFP positive  
856 cells/well detected at 8 hours post-transfection of BHK-21 cells. WT represents the original O1K  
857 replicon sequence. 3D-GNN is the polymerase defective negative control. 5' *Eagl* replicon possesses  
858 mutations to the sequence to create an *Eagl* site at the 5' end of the S fragment. 3' *Eagl* possesses  
859 mutations to the sequence to create an *Eagl* site at the 3' end of the S fragment. Aerie shows replicon  
860 with both 5' and 3' sites modified and Aerie 3D-GNN comprises both *Eagl* sites and 3D-GNN mutation.  
861 n=2, error bars represent SEM.

862

863

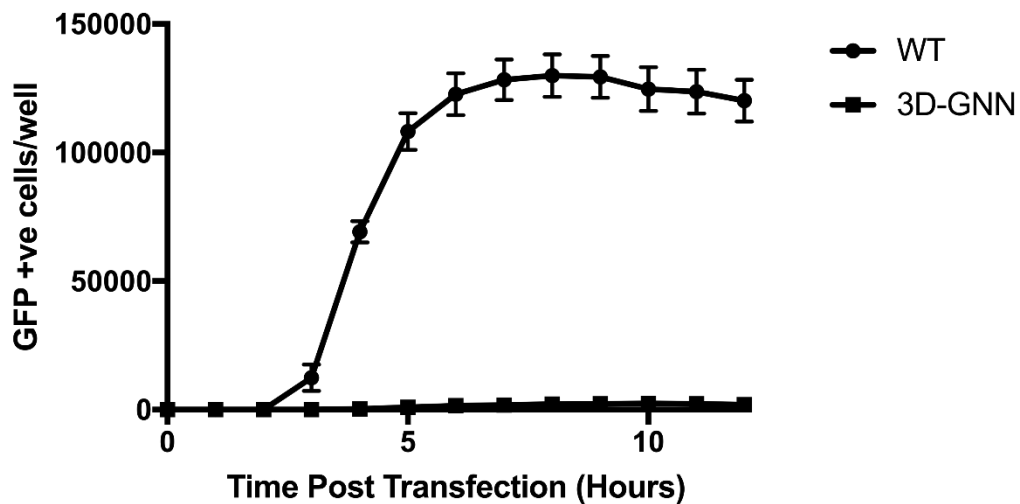

864

865

866 **Supplementary Figure S2. Time course of FMDV replicon replication.** Number of GFP positive  
867 cells/well detected at hourly time points post-transfection of WT and 3D-GNN replicons in BHK-21  
868 cells. n=2, error bars represent SEM.

869

870

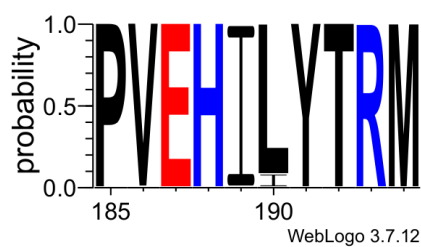

871

872

873 **Supplementary Figure S3. Conservation of the isoleucine at the position 189 (I189) within the 3D<sup>pol</sup>**  
874 **protein of FMDV.** Sequence logo based on 1123 sequences of FMDV 3D<sup>pol</sup> available on fmdbase.org  
875 and prepared using WebLogo 3 server. The x-axis represents amino acids positions of the 3D<sup>pol</sup> protein  
876 of FMDV, while the y-axis shows probability of a particular amino acid being present at a given position.  
877 Amino acids are colour-coded according to their charge.

878

879  
880  
881

**Supplementary Table S1**

882

FMDV sequences selected from GenBank

| <b>Serotype:</b> | <b>Number of isolates:</b> | <b>GenBank accession numbers:</b>                                                                                                                                                                                |
|------------------|----------------------------|------------------------------------------------------------------------------------------------------------------------------------------------------------------------------------------------------------------|
| A                | 19                         | AY593788, MH053305, JF749843, HM854024, HQ832580, MH053306, KM268896, AY593802, KJ608371, MH053307, AY593751, AY593754, AY593761, AY593764, AY593766, AY593767, HM854022, AY593791, AY593794                     |
| Asia 1           | 12                         | AY593795, AY687334, DQ533483, DQ989306, DQ989315, DQ989319, EF149010, EF614458, HQ632774, JF739177, KM268898, MF782478                                                                                           |
| C                | 6                          | MH053308, KM268897, MH053309, AJ133357, MH053310, AJ007347                                                                                                                                                       |
| O                | 21                         | AY593819, MH053313, MH053311, MH053312, KF112885, KJ206909, HQ632769, HQ632771, KU291242, KR401154, GU384683, KF694737, AJ539140, MH053315, JX040491, MH053317, MH053318, MH053316, KJ560291, DQ404170, KU821591 |
| SAT 1            | 21                         | AY593838, AY593845, MH053319, AY593844, JF749860, MH053321, AY593846, AY593839, AY593842, AY593841, AY593840, MH053322, AY593843, KM268899, MH053323, MH053324, MH053325, MH053326, MH053327, MW355668, MW355669 |
| SAT2             | 19                         | MH053330, MH053332, MH053328, MH053329, JX014255, MH053333, AY593849, JX014256, MW355670 - MW355673, AY593847, MH053335, KM268900, JF749862, MH053336, MH053337, KU821592,                                       |
| SAT3             | 20                         | AY593853, AY593851, MH053339, MH053340, MH053344, MH053343, AY593850, KJ820999, MH053341, MH053351, KX375417, KM268901, MH053350, MW355674 - MW355680                                                            |

883

884
